# Supplementary material for: Association of short-term exposure to air pollution with emergency visits for respiratory diseases in children
Source: PubMed Central journal article supplement — iScience. 2022 Aug 5;25(9):104879. doi: 10.1016/j.isci.2022.104879 (PMC9440288; doi:10.1016/j.isci.2022.104879), 2022-08-05
Supplement: mmc1.pdf [file mmc1.pdf]

**iScience, Volume 25**

**Supplemental information**

**Association of short-term exposure to air  
pollution with emergency visits  
for respiratory diseases in children**

**Miao He, Yaping Zhong, Yuehan Chen, Nanshan Zhong, and Kefang Lai**

Table S1. Estimated percentage increase [ER (95%CI)] in emergency department visits for total respiratory disease of children associated with 10 $\mu\text{g}/\text{m}^3$  increases in SO<sub>2</sub>, NO<sub>2</sub>, O<sub>3</sub>, PM<sub>10</sub> and PM<sub>2.5</sub> concentrations in Guangzhou, China, related to Figure 2.

|       | SO <sub>2</sub>          | NO <sub>2</sub>        | O <sub>3</sub>         | PM <sub>10</sub>       | PM <sub>2.5</sub>      |
|-------|--------------------------|------------------------|------------------------|------------------------|------------------------|
|       | ER % (95%CI)             | ER% (95%CI)            | ER% (95%CI)            | ER% (95%CI)            | ER% (95%CI)            |
| lag0  | 3.61**<br>(2.07, 5.17)   | 2.71**<br>(2.03, 3.40) | 0.27<br>(-0.08, 0.63)  | 1.95**<br>(1.50, 2.40) | 2.23**<br>(1.65, 2.81) |
| lag1  | 3.70**<br>(2.22, 5.21)   | 2.55**<br>(1.88, 3.22) | 0.46**<br>(0.17, 0.76) | 1.81**<br>(1.37, 2.25) | 2.19**<br>(1.62, 2.77) |
| lag2  | 3.50**<br>(2.04, 4.98)   | 2.21**<br>(1.57, 2.86) | 0.41**<br>(0.13, 0.68) | 1.63**<br>(1.21, 2.06) | 1.86**<br>(1.30, 2.43) |
| lag3  | 2.67**<br>(1.24, 4.11)   | 1.89**<br>(1.27, 2.51) | 0.25<br>(-0.02, 0.52)  | 1.41**<br>(1.00, 1.83) | 1.49**<br>(0.94, 2.04) |
| lag4  | 2.00**<br>(0.62, 3.41)   | 1.70**<br>(1.09, 2.31) | 0.01<br>(-0.25, 0.28)  | 1.17**<br>(0.76, 1.57) | 1.09**<br>(0.55, 1.63) |
| lag5  | 2.29**<br>(0.91, 3.68)   | 1.56**<br>(0.95, 2.17) | -0.11<br>(-0.37, 0.16) | 1.10**<br>(0.70, 1.51) | 1.07**<br>(0.54, 1.61) |
| lag6  | 3.54**<br>(2.17, 4.94)   | 1.68**<br>(1.07, 2.29) | -0.13<br>(-0.39, 0.14) | 1.25**<br>(0.85, 1.65) | 1.43**<br>(0.91, 1.96) |
| lag7  | 3.12**<br>(1.75, 4.51)   | 1.47**<br>(0.86, 2.08) | -0.13<br>(-0.39, 0.14) | 1.17**<br>(0.77, 1.57) | 1.40**<br>(0.87, 1.93) |
| lag01 | 5.18**<br>(3.37, 7.03)   | 3.49**<br>(2.71, 4.27) | 0.55**<br>(0.17, 0.93) | 2.53**<br>(2.01, 3.05) | 2.96**<br>(2.29, 3.63) |
| lag02 | 6.57**<br>(4.53, 8.66)   | 4.13**<br>(3.28, 4.98) | 0.70**<br>(0.29, 1.10) | 3.00**<br>(2.43, 3.57) | 3.44**<br>(2.71, 4.18) |
| lag03 | 7.21**<br>(4.97, 9.49)   | 4.55**<br>(3.64, 5.47) | 0.73**<br>(0.31, 1.15) | 3.29**<br>(2.69, 3.90) | 3.70**<br>(2.90, 4.49) |
| lag04 | 7.59**<br>(5.19, 10.03)  | 4.86**<br>(3.89, 5.83) | 0.65**<br>(0.22, 1.09) | 3.48**<br>(2.84, 4.12) | 3.82**<br>(2.97, 4.67) |
| lag05 | 8.18**<br>(5.64, 10.78)  | 5.16**<br>(4.15, 6.19) | 0.53*<br>(0.08, 0.99)  | 3.72**<br>(3.04, 4.40) | 4.02**<br>(3.12, 4.93) |
| lag06 | 9.53**<br>(6.84, 12.29)  | 5.61**<br>(4.54, 6.68) | 0.44<br>(-0.04, 0.92)  | 4.10**<br>(3.39, 4.82) | 4.48**<br>(3.53, 5.44) |
| lag07 | 10.58**<br>(7.76, 13.48) | 5.96**<br>(4.85, 7.09) | 0.37<br>(-0.14, 0.87)  | 4.44**<br>(3.69, 5.19) | 4.88**<br>(3.88, 5.88) |

\* Significant difference ( $p < 0.05$ ); \*\*Significant difference ( $p < 0.01$ )

Table S2. Estimated percentage increase [ER (95%CI)] in emergency department visits for acute upper respiratory infection of children associated with 10 $\mu$ g/m<sup>3</sup> increases in SO<sub>2</sub>, NO<sub>2</sub>, O<sub>3</sub>, PM<sub>10</sub> and PM<sub>2.5</sub> concentrations in Guangzhou, China, related to Figure 2.

|       | SO <sub>2</sub>          | NO <sub>2</sub>        | O <sub>3</sub>         | PM <sub>10</sub>       | PM <sub>2.5</sub>      |
|-------|--------------------------|------------------------|------------------------|------------------------|------------------------|
|       | ER %(95%CI)              | ER% (95%CI)            | ER% (95%CI)            | ER% (95%CI)            | ER% (95%CI)            |
| lag0  | 4.59**<br>(2.77, 6.43)   | 2.82**<br>(2.00, 3.65) | 0.30<br>(-0.12, 0.73)  | 2.27**<br>(1.74, 2.80) | 2.44**<br>(1.76, 3.13) |
| lag1  | 4.50**<br>(2.75, 6.28)   | 2.58**<br>(1.78, 3.39) | 0.43*<br>(0.08, 0.79)  | 2.11**<br>(1.58, 2.64) | 2.34**<br>(1.66, 3.02) |
| lag2  | 3.94**<br>(2.23, 5.68)   | 2.09**<br>(1.32, 2.87) | 0.34*<br>(0.01, 0.67)  | 1.73**<br>(1.23, 2.24) | 1.94**<br>(1.28, 2.61) |
| lag3  | 2.32**<br>(0.66, 4.02)   | 1.58**<br>(0.83, 2.33) | 0.15<br>(-0.17, 0.48)  | 1.44**<br>(0.95, 1.93) | 1.63**<br>(0.99, 2.28) |
| lag4  | 2.22**<br>(0.60, 3.87)   | 1.29**<br>(0.55, 2.03) | -0.12<br>(-0.44, 0.20) | 1.13**<br>(0.65, 1.61) | 1.14**<br>(0.50, 1.78) |
| lag5  | 1.89*<br>(0.29, 3.52)    | 1.01**<br>(0.28, 1.74) | -0.26<br>(-0.58, 0.05) | 0.95**<br>(0.47, 1.43) | 0.90**<br>(0.27, 1.53) |
| lag6  | 3.09**<br>(1.49, 4.72)   | 1.26**<br>(0.53, 1.99) | -0.26<br>(-0.57, 0.05) | 1.14**<br>(0.67, 1.61) | 1.36**<br>(0.74, 1.98) |
| lag7  | 2.94**<br>(1.34, 4.57)   | 1.26**<br>(0.54, 1.99) | -0.23<br>(-0.54, 0.09) | 1.10**<br>(0.62, 1.57) | 1.44**<br>(0.82, 2.06) |
| lag01 | 6.48**<br>(4.32, 8.67)   | 3.60**<br>(2.65, 4.54) | 0.54*<br>(0.08, 1.01)  | 2.95**<br>(2.34, 3.57) | 3.22**<br>(2.42, 4.02) |
| lag02 | 7.96**<br>(5.53, 10.45)  | 4.16**<br>(3.13, 5.21) | 0.65**<br>(0.17, 1.13) | 3.40**<br>(2.73, 4.08) | 3.70**<br>(2.82, 4.58) |
| lag03 | 8.14**<br>(5.50, 10.85)  | 4.39**<br>(3.29, 5.51) | 0.64*<br>(0.14, 1.14)  | 3.63**<br>(2.91, 4.35) | 3.96**<br>(3.02, 4.92) |
| lag04 | 8.55**<br>(5.72, 11.46)  | 4.51**<br>(3.34, 5.70) | 0.50<br>(-0.02, 1.03)  | 3.77**<br>(3.00, 4.54) | 4.10**<br>(3.08, 4.92) |
| lag05 | 8.77**<br>(5.78, 11.85)  | 4.56**<br>(3.33, 5.81) | 0.31<br>(-0.23, 0.86)  | 3.89**<br>(3.08, 4.71) | 4.17**<br>(3.09, 5.27) |
| lag06 | 9.81**<br>(6.65, 13.07)  | 4.84**<br>(3.55, 6.15) | 0.17<br>(-0.41, 0.74)  | 4.23**<br>(3.36, 5.09) | 4.61**<br>(3.46, 5.76) |
| lag07 | 10.79**<br>(7.46, 14.21) | 5.16**<br>(3.80, 6.54) | 0.06<br>(-0.54, 0.66)  | 4.57**<br>(3.66, 5.48) | 5.07**<br>(3.87, 6.29) |

\* Significant difference ( $p < 0.05$ ); \*\*Significant difference ( $p < 0.01$ )

Table S3. Estimated percentage increase [ER (95%CI)] in emergency department visits for bronchitis of children associated with 10 $\mu\text{g}/\text{m}^3$  increases in SO<sub>2</sub>, NO<sub>2</sub>, O<sub>3</sub>, PM<sub>10</sub> and PM<sub>2.5</sub> concentrations in Guangzhou, China, related to Figure 2.

|       | SO <sub>2</sub>         | NO <sub>2</sub>        | O <sub>3</sub>         | PM <sub>10</sub>       | PM <sub>2.5</sub>      |
|-------|-------------------------|------------------------|------------------------|------------------------|------------------------|
|       | ER % (95%CI)            | ER% (95%CI)            | ER% (95%CI)            | ER% (95%CI)            | ER% (95%CI)            |
| lag0  | 1.39<br>(-0.55, 3.36)   | 2.63**<br>(1.78, 3.48) | 0.36<br>(-0.08, 0.81)  | 1.41**<br>(0.84, 1.97) | 1.79**<br>(1.07, 2.52) |
| lag1  | 2.63**<br>(0.75, 4.55)  | 2.67**<br>(1.84, 3.50) | 0.57**<br>(0.20, 0.94) | 1.64**<br>(1.09, 2.19) | 2.05**<br>(1.34, 2.77) |
| lag2  | 2.53**<br>(0.68, 4.41)  | 2.36**<br>(1.56, 3.16) | 0.71**<br>(0.36, 1.06) | 1.67**<br>(1.14, 2.20) | 1.95**<br>(1.25, 2.65) |
| lag3  | 2.02*<br>(0.20, 3.88)   | 2.23**<br>(1.45, 3.01) | 0.55*<br>(0.21, 0.89)  | 1.55**<br>(1.03, 2.06) | 1.65**<br>(0.96, 2.34) |
| lag4  | 1.80*<br>(0.03, 3.61)   | 2.43**<br>(1.67, 3.20) | 0.34*<br>(0.00, 0.68)  | 1.47**<br>(0.97, 7.99) | 1.30**<br>(0.62, 1.98) |
| lag5  | 3.04**<br>(1.27, 4.84)  | 2.23**<br>(1.47, 3.00) | 0.18<br>(-0.16, 0.52)  | 1.53**<br>(1.02, 2.04) | 1.41**<br>(0.74, 2.09) |
| lag6  | 4.09**<br>(2.32, 5.90)  | 2.31**<br>(1.55, 3.07) | 0.51<br>(-0.13, 0.54)  | 1.43**<br>(0.93, 1.93) | 1.66**<br>(1.00, 2.32) |
| lag7  | 3.66**<br>(1.90, 5.45)  | 1.97**<br>(1.21, 2.73) | 0.12<br>(-0.22, 0.46)  | 1.37**<br>(0.88, 1.87) | 1.56**<br>(0.90, 2.23) |
| lag01 | 2.85*<br>(0.58, 5.18)   | 3.50**<br>(2.54, 4.47) | 0.68**<br>(0.21, 1.16) | 2.06**<br>(1.41, 2.71) | 2.58**<br>(1.74, 3.42) |
| lag02 | 3.97**<br>(1.40, 6.60)  | 4.21**<br>(3.15, 5.27) | 0.99**<br>(0.49, 1.49) | 2.64**<br>(1.93, 3.36) | 3.19**<br>(2.27, 4.12) |
| lag03 | 4.60**<br>(1.78, 7.49)  | 4.82**<br>(3.68, 5.98) | 1.14**<br>(0.62, 1.67) | 3.10**<br>(2.34, 3.87) | 3.61**<br>(2.61, 4.62) |
| lag04 | 5.02**<br>(2.02, 8.11)  | 5.45**<br>(4.25, 6.67) | 1.18**<br>(0.64, 1.73) | 3.45**<br>(2.64, 4.26) | 3.82**<br>(2.75, 4.90) |
| lag05 | 6.20**<br>(3.00, 9.50)  | 6.05**<br>(4.78, 7.33) | 1.16**<br>(0.59, 1.73) | 3.91**<br>(3.05, 4.77) | 4.20**<br>(3.07, 5.35) |
| lag06 | 7.88**<br>(4.48, 11.39) | 6.71**<br>(5.37, 8.07) | 1.17**<br>(0.58, 1.78) | 4.35**<br>(3.45, 5.26) | 4.73**<br>(3.53, 5.94) |
| lag07 | 9.21**<br>(5.64, 12.90) | 7.22**<br>(5.83, 8.64) | 1.18**<br>(0.56, 1.81) | 4.75**<br>(3.80, 5.70) | 5.15**<br>(3.90, 6.42) |

\* Significant difference ( $p < 0.05$ ); \*\*Significant difference ( $p < 0.01$ )

Table S4. Estimated percentage increase [ER (95%CI)] in emergency department visits for pneumonia of children associated with 10 $\mu$ g/m<sup>3</sup> increases in SO<sub>2</sub>, NO<sub>2</sub>, O<sub>3</sub>, PM<sub>10</sub> and PM<sub>2.5</sub> concentrations in Guangzhou, China, related to Figure 2.

|       | SO <sub>2</sub>          | NO <sub>2</sub>          | O <sub>3</sub>         | PM <sub>10</sub>       | PM <sub>2.5</sub>       |
|-------|--------------------------|--------------------------|------------------------|------------------------|-------------------------|
|       | ER %(95%CI)              | ER% (95%CI)              | ER% (95%CI)            | ER% (95%CI)            | ER% (95%CI)             |
| lag0  | 4.06*<br>(1.09, 7.12)    | 3.98**<br>(2.75, 5.23)   | 1.08**<br>(0.46, 1.72) | 1.91**<br>(1.09, 2.73) | 2.65**<br>(1.59, 3.71)  |
| lag1  | 5.46**<br>(2.71, 8.28)   | 4.13**<br>(2.93, 5.34)   | 1.05**<br>(0.52, 1.59) | 2.27**<br>(1.47, 3.07) | 3.17**<br>(2.14, 4.22)  |
| lag2  | 4.38**<br>(1.69, 7.15)   | 4.17**<br>(3.02, 5.32)   | 0.91**<br>(0.42, 1.40) | 2.28**<br>(1.52, 3.05) | 2.75**<br>(1.74, 3.77)  |
| lag3  | 4.24**<br>(1.57, 6.98)   | 3.59**<br>(2.46, 4.73)   | 1.06**<br>(0.57, 1.54) | 2.08**<br>(1.33, 2.83) | 2.26**<br>(1.26, 3.26)  |
| lag4  | 2.89*<br>(0.29, 5.55)    | 3.32**<br>(2.21, 4.45)   | 0.80**<br>(0.32, 1.29) | 1.82**<br>(1.08, 2.57) | 2.05**<br>(1.07, 3.05)  |
| lag5  | 3.49**<br>(0.91, 6.14)   | 3.30**<br>(2.19, 4.42)   | 0.79**<br>(0.31, 1.28) | 1.98**<br>(1.24, 2.72) | 2.24**<br>(1.26, 3.23)  |
| lag6  | 3.47**<br>(0.89, 6.11)   | 3.26**<br>(2.16, 4.38)   | 0.58*<br>(0.09, 1.06)  | 2.18**<br>(1.46, 2.92) | 2.57**<br>(1.60, 3.54)  |
| lag7  | 3.84**<br>(1.27, 6.49)   | 3.06**<br>(1.95, 4.17)   | 0.30<br>(-0.19, 0.79)  | 2.04**<br>(1.31, 2.77) | 2.85**<br>(1.88, 3.82)  |
| lag01 | 5.95**<br>(2.61, 9.41)   | 5.39**<br>(3.99, 6.82)   | 1.52**<br>(0.84, 2.21) | 2.84**<br>(1.90, 3.79) | 3.97**<br>(2.74, 5.21)  |
| lag02 | 7.81**<br>(4.01, 11.76)  | 6.79**<br>(5.25, 8.36)   | 1.75**<br>(1.04, 2.47) | 3.67**<br>(2.63, 4.72) | 4.85**<br>(3.49, 6.23)  |
| lag03 | 9.53**<br>(5.31, 13.92)  | 7.84**<br>(6.17, 9.54)   | 2.07**<br>(1.32, 2.82) | 4.34**<br>(3.22, 5.48) | 5.49**<br>(4.01, 7.00)  |
| lag04 | 10.30**<br>(5.75, 15.04) | 8.64**<br>(6.86, 10.45)  | 2.26**<br>(1.47, 3.05) | 4.80**<br>(3.60, 6.02) | 6.02**<br>(4.42, 7.64)  |
| lag05 | 11.55**<br>(6.69, 16.63) | 9.54**<br>(7.65, 11.46)  | 2.47**<br>(1.64, 3.30) | 5.49**<br>(4.21, 6.79) | 6.81**<br>(5.10, 8.55)  |
| lag06 | 12.74**<br>(7.58, 18.13) | 10.45**<br>(8.46, 12.47) | 2.60**<br>(1.73, 3.48) | 6.31**<br>(4.95, 7.68) | 7.78**<br>(5.96, 9.64)  |
| lag07 | 14.13**<br>(8.69, 19.85) | 11.28**<br>(9.18, 13.41) | 2.66**<br>(1.74, 3.58) | 7.07**<br>(5.63, 8.52) | 8.85**<br>(6.93, 10.81) |

\* Significant difference ( $p < 0.05$ ); \*\*Significant difference ( $p < 0.01$ )

Table S5. Estimated percentage increase [ER (95%CI)] in emergency department visits for asthma of children associated with 10 $\mu\text{g}/\text{m}^3$  increases in SO<sub>2</sub>, NO<sub>2</sub>, O<sub>3</sub>, PM<sub>10</sub> and PM<sub>2.5</sub> concentrations in Guangzhou, China, related to Figure 2.

|       | SO <sub>2</sub>        | NO <sub>2</sub>        | O <sub>3</sub>        | PM <sub>10</sub>       | PM <sub>2.5</sub>      |
|-------|------------------------|------------------------|-----------------------|------------------------|------------------------|
|       | ER % (95%CI)           | ER% (95%CI)            | ER% (95%CI)           | ER% (95%CI)            | ER% (95%CI)            |
| lag0  | 2.76<br>(-0.97, 6.62)  | 2.14*<br>(0.51, 3.79)  | 0.33<br>(-0.50, 1.17) | 1.20*<br>(0.09, 2.33)  | 1.78*<br>(0.34, 3.24)  |
| lag1  | 1.09<br>(-2.49, 4.80)  | 1.39<br>(-0.21, 3.01)  | 0.29<br>(-0.42, 1.00) | 1.00<br>(-0.08, 2.10)  | 0.99<br>(-0.43, 2.42)  |
| lag2  | 2.78<br>(-0.78, 6.47)  | 2.14**<br>(0.60, 3.71) | 0.38<br>(-0.28, 1.05) | 1.38**<br>(0.33, 2.44) | 0.96<br>(-0.42, 2.36)  |
| lag3  | 3.00<br>(-0.52, 6.65)  | 2.96**<br>(1.45, 4.49) | 0.38<br>(-0.28, 1.03) | 1.64**<br>(0.61, 2.67) | 1.59*<br>(0.23, 2.96)  |
| lag4  | 3.20<br>(-0.29, 6.81)  | 2.41**<br>(0.91, 3.93) | 0.54<br>(-0.11, 1.19) | 1.29*<br>(0.26, 2.32)  | 0.89<br>(-0.46, 2.26)  |
| lag5  | 0.22<br>(-0.020, 3.75) | 1.32<br>(-0.18, 2.84)  | 0.47<br>(-0.18, 1.12) | 0.50<br>(-0.53, 1.54)  | 0.05<br>(-1.30, 1.41)  |
| lag6  | -0.43<br>(-3.82, 3.09) | 0.77<br>(-0.72, 2.29)  | 0.47<br>(-0.18, 1.12) | 0.89<br>(-0.13, 1.92)  | 0.62<br>(-0.72, 1.97)  |
| lag7  | 1.25<br>(-2.16, 4.79)  | 0.76<br>(-0.73, 2.27)  | 0.29<br>(-0.36, 0.94) | 1.09*<br>(0.07, 2.11)  | 1.07<br>(-0.26, 2.43)  |
| lag01 | 2.66<br>(-1.67, 7.17)  | 2.31*<br>(0.45, 4.21)  | 0.43<br>(-0.47, 1.35) | 1.48*<br>(0.20, 2.77)  | 1.83*<br>(0.19, 3.51)  |
| lag02 | 3.91<br>(-0.95, 9.01)  | 3.11**<br>(1.06, 5.20) | 0.58<br>(-0.37, 1.53) | 1.98**<br>(0.58, 3.40) | 2.00*<br>(0.20, 3.84)  |
| lag03 | 5.21<br>(-0.12, 10.82) | 4.28**<br>(2.06, 6.54) | 0.69<br>(-0.30, 1.70) | 2.58**<br>(1.08, 4.11) | 2.56**<br>(0.62, 4.55) |
| lag04 | 6.53*<br>(0.77, 12.61) | 5.03**<br>(2.67, 7.46) | 0.90<br>(-0.15, 1.96) | 2.94**<br>(1.35, 4.56) | 2.75**<br>(0.68, 4.87) |
| lag05 | 6.18*<br>(0.09, 12.65) | 5.25**<br>(2.74, 7.82) | 1.05<br>(-0.06, 2.16) | 2.95**<br>(1.26, 4.67) | 2.57*<br>(0.37, 4.82)  |
| lag06 | 5.64<br>(-0.75, 12.45) | 5.28**<br>(2.64, 7.99) | 1.20*<br>(0.04, 2.37) | 3.16**<br>(1.38, 4.98) | 2.68*<br>(0.36, 5.05)  |
| lag07 | 5.71<br>(-0.98, 12.85) | 5.28**<br>(2.53, 8.11) | 1.28*<br>(0.06, 2.51) | 3.38**<br>(1.51, 5.28) | 2.86*<br>(0.44, 5.34)  |

\* Significant difference ( $p < 0.05$ ); \*\*Significant difference ( $p < 0.01$ )

Table S6. Estimated percentage increase [ER (95%CI)] in emergency department visits for total respiratory disease in boys and girls associated with 10µg/m<sup>3</sup> increases in SO<sub>2</sub>, NO<sub>2</sub>, O<sub>3</sub>, PM<sub>10</sub> and PM<sub>2.5</sub> concentrations in Guangzhou, China, related to Figure 3.

|       | SO <sub>2</sub><br>ER %(95%CI) | NO <sub>2</sub><br>ER% (95%CI) | O <sub>3</sub><br>ER% (95%CI) | PM <sub>10</sub><br>ER% (95%CI) | PM <sub>2.5</sub><br>ER% (95%CI) |
|-------|--------------------------------|--------------------------------|-------------------------------|---------------------------------|----------------------------------|
| Boy   |                                |                                |                               |                                 |                                  |
| lag0  | 3.75**<br>(2.21, 5.30)         | 2.72**<br>(2.04, 3.40)         | 0.28<br>(-0.07, 0.63)         | 1.97**<br>(1.52, 2.42)          | 2.19**<br>(1.62, 2.77)           |
| lag1  | 3.80**<br>(2.31, 5.30)         | 2.52**<br>(1.85, 3.18)         | 0.48**<br>(0.18, 0.77)        | 1.81**<br>(1.37, 2.25)          | 2.20**<br>(1.63, 2.77)           |
| lag2  | 3.41**<br>(1.95, 4.88)         | 2.07**<br>(1.43, 2.72)         | 0.44**<br>(0.16, 0.71)        | 1.59**<br>(1.17, 2.02)          | 1.80**<br>(1.24, 2.36)           |
| lag3  | 2.51**<br>(1.08, 3.95)         | 1.73**<br>(1.11, 2.36)         | 0.24<br>(-0.03, 0.51)         | 1.35**<br>(0.94, 1.76)          | 1.43**<br>(0.88, 1.98)           |
| lag4  | 1.84**<br>(0.46, 3.25)         | 1.57**<br>(0.96, 2.18)         | 0.01<br>(-0.25, 0.28)         | 1.06**<br>(0.65, 1.47)          | 0.98**<br>(0.44, 1.52)           |
| lag5  | 2.21**<br>(0.84, 3.60)         | 1.46**<br>(0.84, 2.07)         | -0.14<br>(-0.41, 0.12)        | 1.01**<br>(0.60, 1.41)          | 0.96**<br>(0.42, 1.50)           |
| lag6  | 3.48**<br>(2.10, 4.87)         | 1.60**<br>(1.00, 2.21)         | -0.16<br>(-0.42, 0.11)        | 1.22**<br>(0.82, 1.61)          | 1.36**<br>(0.83, 1.88)           |
| lag7  | 3.05**<br>(1.68, 4.43)         | 1.41**<br>(0.81, 2.02)         | -0.14<br>(-0.40, 0.13)        | 1.13**<br>(0.73, 1.53)          | 1.34**<br>(0.82, 1.87)           |
| lag01 | 5.35**<br>(3.54, 7.19)         | 3.47**<br>(2.70, 4.25)         | 0.56**<br>(0.18, 0.95)        | 2.54**<br>(2.03, 3.06)          | 2.94**<br>(2.28, 3.61)           |
| lag02 | 6.65**<br>(4.61, 8.73)         | 4.03**<br>(3.18, 4.88)         | 0.73**<br>(0.33, 1.13)        | 2.98**<br>(2.42, 3.55)          | 3.39**<br>(2.66, 4.13)           |
| lag03 | 7.21**<br>(4.98, 9.49)         | 4.38**<br>(3.47, 5.30)         | 0.75**<br>(0.34, 1.17)        | 3.25**<br>(2.65, 3.86)          | 3.63**<br>(2.83, 4.42)           |
| lag04 | 7.50**<br>(5.11, 9.94)         | 4.64**<br>(3.68, 5.61)         | 0.67**<br>(0.24, 1.11)        | 3.39**<br>(2.75, 4.03)          | 3.70**<br>(2.85, 4.55)           |
| lag05 | 8.07**<br>(5.54, 10.67)        | 4.92**<br>(3.91, 5.95)         | 0.53*<br>(0.08, 0.99)         | 3.59**<br>(2.91, 4.28)          | 3.86**<br>(2.96, 4.77)           |
| lag06 | 9.39**<br>(6.70, 12.15)        | 5.34**<br>(4.27, 6.42)         | 0.43<br>(-0.05, 0.90)         | 3.96**<br>(3.24, 4.68)          | 4.29**<br>(3.33, 5.25)           |
| lag07 | 10.40**<br>(7.60, 13.30)       | 5.68**<br>(4.57, 6.81)         | 0.35<br>(-0.15, 0.85)         | 4.29**<br>(3.53, 5.04)          | 4.67**<br>(3.67, 5.67)           |
| Girl  |                                |                                |                               |                                 |                                  |
| lag0  | 3.41**<br>(1.79, 5.05)         | 2.70**<br>(1.98, 3.42)         | 0.26<br>(-0.11, 0.63)         | 1.92**<br>(1.45, 2.39)          | 2.28**<br>(1.68, 2.89)           |
| lag1  | 3.57**<br>(2.01, 5.16)         | 2.59**<br>(1.89, 3.30)         | 0.45**<br>(0.13, 0.76)        | 1.81**<br>(1.35, 2.28)          | 2.18**<br>(1.57, 2.78)           |
| lag2  | 3.63**<br>(2.10, 5.19)         | 2.41**<br>(1.74, 3.09)         | 0.36*<br>(0.07, 0.65)         | 1.69**<br>(1.24, 2.14)          | 1.95**<br>(1.36, 2.54)           |

|       |                          |                        |                        |                        |                        |
|-------|--------------------------|------------------------|------------------------|------------------------|------------------------|
| lag3  | 2.89**<br>(1.39, 4.41)   | 2.11**<br>(1.46, 2.77) | 0.27<br>(-0.02, 0.55)  | 1.50**<br>(1.07, 1.93) | 1.57**<br>(1.00, 2.15) |
| lag4  | 2.23**<br>(0.77, 3.70)   | 1.88**<br>(1.24, 2.53) | 0.01<br>(-0.27, 0.30)  | 1.32**<br>(0.89, 1.74) | 1.24**<br>(0.68, 1.81) |
| lag5  | 2.39**<br>(0.95, 3.85)   | 1.71**<br>(1.07, 2.35) | -0.06<br>(-0.34, 0.22) | 1.24**<br>(0.82, 1.67) | 1.23**<br>(0.67, 1.79) |
| lag6  | 3.64**<br>(2.19, 5.10)   | 1.79**<br>(1.15, 2.43) | -0.09<br>(-0.37, 0.20) | 1.30**<br>(0.89, 1.72) | 1.54**<br>(0.99, 2.09) |
| lag7  | 3.23**<br>(1.79, 4.69)   | 1.54**<br>(0.91, 2.18) | -0.11<br>(-0.39, 0.17) | 1.22**<br>(0.80, 1.64) | 1.48**<br>(0.93, 2.03) |
| lag01 | 4.95**<br>(3.04, 6.89)   | 3.51**<br>(2.70, 4.34) | 0.53*<br>(0.12, 0.93)  | 2.51**<br>(1.97, 3.06) | 2.99**<br>(2.28, 3.69) |
| lag02 | 6.46**<br>(4.31, 8.66)   | 4.27**<br>(3.37, 5.17) | 0.65**<br>(0.22, 1.07) | 3.02**<br>(2.42, 3.62) | 3.52**<br>(2.72, 4.30) |
| lag03 | 7.21**<br>(4.86, 9.61)   | 4.78**<br>(3.82, 5.75) | 0.70**<br>(0.26, 1.14) | 3.35**<br>(2.71, 3.99) | 3.79**<br>(2.96, 4.63) |
| lag04 | 7.71**<br>(5.19, 10.29)  | 5.16**<br>(4.14, 6.18) | 0.63**<br>(0.16, 1.09) | 3.60**<br>(2.93, 4.28) | 3.98**<br>(3.09, 4.88) |
| lag05 | 8.33**<br>(5.66, 11.07)  | 5.51**<br>(4.44, 6.59) | 0.53*<br>(0.05, 1.02)  | 3.89**<br>(3.18, 4.61) | 4.24**<br>(3.29, 5.19) |
| lag06 | 9.74**<br>(6.91, 12.64)  | 5.98**<br>(4.86, 7.12) | 0.46<br>(-0.05, 0.96)  | 4.30**<br>(3.55, 5.06) | 4.75**<br>(3.75, 5.76) |
| lag07 | 10.82**<br>(7.85, 13.87) | 6.35**<br>(5.18, 7.54) | 0.39<br>(-0.14, 0.92)  | 4.65**<br>(3.86, 5.45) | 5.17**<br>(4.12, 6.23) |

\* Significant difference ( $p < 0.05$ ); \*\*Significant difference ( $p < 0.01$ )



Table S7. Estimated percentage increase [ER (95%CI)] in emergency department visits for acute upper respiratory infection in boys and girls associated with 10 $\mu\text{g}/\text{m}^3$  increases in SO<sub>2</sub>, NO<sub>2</sub>, O<sub>3</sub>, PM<sub>10</sub> and PM<sub>2.5</sub> concentrations in Guangzhou, China, related to Figure 3.

|             | SO <sub>2</sub><br>ER %(95%CI) | NO <sub>2</sub><br>ER% (95%CI) | O <sub>3</sub><br>ER% (95%CI) | PM <sub>10</sub><br>ER% (95%CI) | PM <sub>2.5</sub><br>ER% (95%CI) |
|-------------|--------------------------------|--------------------------------|-------------------------------|---------------------------------|----------------------------------|
| <b>Boy</b>  |                                |                                |                               |                                 |                                  |
| lag0        | 5.03**<br>(3.19, 6.90)         | 2.89**<br>(2.06, 3.73)         | 0.33<br>(-0.09, 0.76)         | 2.38**<br>(1.84, 2.92)          | 2.51**<br>(1.82, 3.21)           |
| lag1        | 4.78**<br>(3.00, 6.58)         | 2.60**<br>(1.78, 3.42)         | 0.49**<br>(0.13, 0.85)        | 2.23**<br>(1.70, 2.76)          | 2.52**<br>(1.83, 3.21)           |
| lag2        | 3.93**<br>(2.20, 5.68)         | 1.94**<br>(1.16, 2.73)         | 0.38*<br>(0.05, 0.71)         | 1.72**<br>(1.21, 2.24)          | 1.93**<br>(1.26, 2.61)           |
| lag3        | 2.25**<br>(0.56, 3.96)         | 1.50**<br>(0.75, 2.26)         | 0.14<br>(-0.18, 0.46)         | 1.44**<br>(0.95, 1.94)          | 1.62**<br>(0.96, 2.27)           |
| lag4        | 2.22**<br>(0.57, 3.89)         | 1.20**<br>(0.45, 1.94)         | -0.08<br>(-0.40, 0.24)        | 1.12**<br>(0.64, 1.61)          | 1.12**<br>(0.48, 1.77)           |
| lag5        | 2.02*<br>(0.39, 3.67)          | 0.88*<br>(0.14, 1.62)          | -0.28<br>(-0.60, 0.04)        | 0.89**<br>(0.40, 1.38)          | 0.80*<br>(0.16, 1.44)            |
| lag6        | 2.97**<br>(1.35, 4.63)         | 1.12**<br>(0.38, 1.86)         | -0.30<br>(-0.62, 0.02)        | 1.09**<br>(0.62, 1.57)          | 1.27**<br>(0.64, 1.90)           |
| lag7        | 2.85**<br>(1.22, 4.50)         | 1.23**<br>(0.50, 1.97)         | -0.24<br>(-0.56, 0.08)        | 1.06**<br>(0.58, 1.54)          | 1.35**<br>(0.72, 1.98)           |
| lag01       | 6.99**<br>(4.81, 9.21)         | 3.65**<br>(2.70, 4.61)         | 0.61*<br>(0.15, 1.08)         | 3.11**<br>(2.49, 3.73)          | 3.39**<br>(2.58, 4.19)           |
| lag02       | 8.39**<br>(5.93, 10.90)        | 4.12**<br>(3.08, 5.17)         | 0.73**<br>(0.24, 1.21)        | 3.52**<br>(2.84, 4.21)          | 3.93**<br>(2.94, 4.72)           |
| lag03       | 8.50**<br>(5.83, 11.24)        | 4.32**<br>(3.20, 5.45)         | 0.69**<br>(0.19, 1.20)        | 3.74**<br>(3.02, 4.48)          | 4.08**<br>(3.12, 5.05)           |
| lag04       | 8.88**<br>(6.01, 11.83)        | 4.40**<br>(3.21, 5.59)         | 0.57*<br>(0.04, 1.10)         | 3.87**<br>(3.09, 4.65)          | 4.20**<br>(3.17, 5.23)           |
| lag05       | 9.20**<br>(6.16, 12.32)        | 4.41**<br>(3.16, 5.67)         | 0.37<br>(-0.19, 0.92)         | 3.98**<br>(3.15, 4.81)          | 4.24**<br>(3.14, 5.35)           |
| lag06       | 10.16**<br>(6.95, 13.47)       | 4.63**<br>(3.32, 5.96)         | 0.20<br>(-0.38, 0.78)         | 4.28**<br>(3.41, 5.16)          | 4.62**<br>(3.46, 5.80)           |
| lag07       | 11.08**<br>(7.71, 14.57)       | 4.95**<br>(3.57, 6.34)         | 0.08<br>(-0.52, 0.69)         | 4.61**<br>(3.69, 5.54)          | 5.06**<br>(3.83, 6.29)           |
| <b>Girl</b> |                                |                                |                               |                                 |                                  |
| lag0        | 4.00**<br>(2.07, 5.96)         | 2.73**<br>(1.86, 3.62)         | 0.26<br>(-0.19, 0.72)         | 2.12**<br>(1.56, 2.69)          | 2.35**<br>(1.62, 3.08)           |
| lag1        | 4.13**<br>(2.27, 6.03)         | 2.57**<br>(1.71, 3.43)         | 0.36<br>(-0.02, 0.74)         | 1.94**<br>(1.39, 2.51)          | 2.10**<br>(1.38, 2.83)           |
| lag2        | 3.97**<br>(2.15, 5.82)         | 2.29**<br>(1.47, 3.12)         | 0.28<br>(-0.07, 0.63)         | 1.75**<br>(1.21, 2.28)          | 1.95**<br>(1.24, 2.66)           |

|       |                          |                        |                        |                        |                        |
|-------|--------------------------|------------------------|------------------------|------------------------|------------------------|
| lag3  | 2.43**<br>(0.66, 4.23)   | 1.68**<br>(0.89, 2.48) | 0.17<br>(-0.17, 0.52)  | 1.43**<br>(0.92, 1.95) | 1.66**<br>(0.97, 2.35) |
| lag4  | 2.23*<br>(0.50, 3.99)    | 1.41**<br>(0.63, 2.20) | -0.17<br>(-0.51, 0.17) | 1.14**<br>(0.62, 1.65) | 1.15**<br>(0.48, 1.83) |
| lag5  | 1.71*<br>(0.03, 3.46)    | 1.18**<br>(0.41, 1.96) | -0.23<br>(-0.57, 0.11) | 1.03**<br>(0.52, 1.54) | 1.04**<br>(0.38, 1.71) |
| lag6  | 3.25**<br>(1.54, 4.99)   | 1.44**<br>(0.67, 2.22) | -0.21<br>(0.54, 0.13)  | 1.21**<br>(0.71, 1.71) | 1.48**<br>(0.82, 2.14) |
| lag7  | 3.08**<br>(1.37, 4.81)   | 1.30**<br>(0.53, 2.08) | -0.21<br>(-0.55, 0.13) | 1.14**<br>(0.64, 1.64) | 1.55**<br>(0.90, 2.22) |
| lag01 | 5.79**<br>(3.51, 8.12)   | 3.53**<br>(2.53, 4.54) | 0.46<br>(-0.03, 0.95)  | 2.74**<br>(2.09, 3.40) | 2.99**<br>(2.15, 3.84) |
| lag02 | 7.40**<br>(4.82, 10.05)  | 4.23**<br>(3.13, 5.34) | 0.54*<br>(0.03, 1.06)  | 3.24**<br>(2.52, 3.97) | 3.53**<br>(2.59, 4.47) |
| lag03 | 7.66**<br>(4.85, 10.05)  | 4.50**<br>(3.32, 5.69) | 0.56*<br>(0.03, 1.10)  | 3.47**<br>(2.70, 4.25) | 3.81**<br>(2.80, 4.83) |
| lag04 | 8.11**<br>(5.10, 11.21)  | 4.67**<br>(3.42, 5.93) | 0.41<br>(-0.15, 0.97)  | 3.63**<br>(2.81, 4.46) | 3.96**<br>(2.88, 5.06) |
| lag05 | 8.21**<br>(5.04, 11.48)  | 4.77**<br>(3.46, 6.09) | 0.24<br>(-0.35, 0.82)  | 3.78**<br>(2.91, 4.66) | 4.09**<br>(2.94, 5.25) |
| lag06 | 9.36**<br>(6.01, 12.83)  | 5.12**<br>(3.74, 6.52) | 0.12<br>(-0.49, 0.74)  | 4.15**<br>(3.23, 5.08) | 4.59**<br>(3.37, 5.82) |
| lag07 | 10.40**<br>(6.87, 14.04) | 5.44**<br>(4.00, 6.91) | 0.02<br>(-0.62, 0.66)  | 4.51**<br>(3.54, 5.49) | 5.10**<br>(3.81, 6.40) |

\* Significant difference ( $p < 0.05$ ); \*\*Significant difference ( $p < 0.01$ )

Table S8. Estimated percentage increase [ER (95%CI)] in emergency department visits for bronchitis in boys and girls associated with 10 $\mu\text{g}/\text{m}^3$  increases in SO<sub>2</sub>, NO<sub>2</sub>, O<sub>3</sub>, PM<sub>10</sub> and PM<sub>2.5</sub> concentrations in Guangzhou, China, related to Figure 3.

|       | SO <sub>2</sub><br>ER % (95%CI) | NO <sub>2</sub><br>ER% (95%CI) | O <sub>3</sub><br>ER% (95%CI) | PM <sub>10</sub><br>ER% (95%CI) | PM <sub>2.5</sub><br>ER% (95%CI) |
|-------|---------------------------------|--------------------------------|-------------------------------|---------------------------------|----------------------------------|
| Boy   |                                 |                                |                               |                                 |                                  |
| lag0  | 1.95<br>(-0.03, 3.97)           | 2.81**<br>(1.95, 3.68)         | 0.40<br>(-0.05, 0.85)         | 1.53**<br>(0.96, 2.11)          | 1.86**<br>(1.12, 2.60)           |
| lag1  | 3.02**<br>(1.10, 4.98)          | 2.74**<br>(1.90, 3.59)         | 0.61**<br>(0.24, 0.99)        | 1.69**<br>(1.13, 2.25)          | 2.09**<br>(1.36, 2.82)           |
| lag2  | 2.53**<br>(0.65, 4.45)          | 2.22**<br>(1.41, 3.04)         | 0.81**<br>(0.46, 1.17)        | 1.63**<br>(1.09, 2.17)          | 1.87**<br>(1.16, 2.58)           |
| lag3  | 2.12*<br>(0.26, 4.01)           | 2.08**<br>(1.29, 2.88)         | 0.58**<br>(0.23, 0.93)        | 1.42**<br>(0.90, 1.95)          | 1.50**<br>(0.80, 2.20)           |
| lag4  | 1.87*<br>(0.06, 3.72)           | 2.31**<br>(1.53, 3.10)         | 0.35*<br>(0.00, 0.69)         | 1.33**<br>(0.81, 1.85)          | 1.14**<br>(0.45, 1.84)           |
| lag5  | 3.40**<br>(1.58, 5.24)          | 2.20**<br>(1.42, 2.99)         | 0.18<br>(-0.17, 0.52)         | 1.40**<br>(0.88, 1.92)          | 1.32**<br>(0.64, 2.01)           |
| lag6  | 4.26**<br>(2.44, 6.11)          | 2.18**<br>(1.40, 2.96)         | 0.21<br>(-0.13, 0.56)         | 1.31**<br>(0.80, 1.82)          | 1.47**<br>(0.79, 2.15)           |
| lag7  | 3.74**<br>(1.94, 5.57)          | 1.78**<br>(1.01, 2.56)         | 0.13<br>(-0.22, 0.47)         | 1.33**<br>(0.82, 1.84)          | 1.49**<br>(0.81, 2.17)           |
| lag01 | 3.52**<br>(1.20, 5.90)          | 3.67**<br>(2.69, 4.66)         | 0.74**<br>(0.25, 1.23)        | 2.17**<br>(1.51, 2.84)          | 2.65**<br>(1.79, 3.50)           |
| lag02 | 4.53**<br>(1.91, 7.22)          | 4.26**<br>(3.18, 5.35)         | 1.11**<br>(0.60, 1.62)        | 2.71**<br>(1.99, 3.44)          | 3.20**<br>(2.26, 4.15)           |
| lag03 | 5.15**<br>(2.27, 8.11)          | 4.79**<br>(3.62, 5.96)         | 1.25**<br>(0.72, 1.79)        | 3.09**<br>(2.31, 3.87)          | 3.53**<br>(2.51, 4.56)           |
| lag04 | 5.62**<br>(2.54, 8.79)          | 5.38**<br>(4.15, 6.63)         | 1.28**<br>(0.73, 1.85)        | 3.38**<br>(2.55, 4.21)          | 3.70**<br>(2.61, 4.80)           |
| lag05 | 6.98**<br>(3.69, 10.37)         | 5.97**<br>(4.67, 7.29)         | 1.25**<br>(0.67, 1.84)        | 3.79**<br>(2.91, 4.67)          | 4.05**<br>(2.89, 5.22)           |
| lag06 | 8.68**<br>(5.19, 12.29)         | 6.58**<br>(5.21, 7.97)         | 1.26**<br>(0.65, 1.88)        | 4.17**<br>(3.25, 5.10)          | 4.48**<br>(3.26, 5.72)           |
| lag07 | 10.04**<br>(6.37, 13.83)        | 7.02**<br>(5.59, 8.47)         | 1.27**<br>(0.63, 1.91)        | 4.55**<br>(3.58, 5.52)          | 4.89**<br>(3.61, 6.18)           |
| Girl  |                                 |                                |                               |                                 |                                  |
| lag0  | 0.49<br>(-1.73, 2.77)           | 2.34**<br>(1.36, 3.33)         | 0.30<br>(-0.21, 0.82)         | 1.21**<br>(0.56, 1.87)          | 1.68**<br>(0.84, 2.53)           |
| lag1  | 2.03<br>(-0.14, 4.24)           | 2.56**<br>(1.60, 3.52)         | 0.50*<br>(0.07, 0.93)         | 1.57**<br>(0.93, 2.21)          | 2.00**<br>(1.17, 2.83)           |
| lag2  | 2.53*<br>(0.40, 4.72)           | 2.58**<br>(1.66, 3.50)         | 0.54**<br>(0.14, 0.94)        | 1.74**<br>(1.13, 2.36)          | 2.08**<br>(1.27, 2.89)           |

|       |                         |                        |                        |                        |                        |
|-------|-------------------------|------------------------|------------------------|------------------------|------------------------|
| lag3  | 1.88<br>(-0.23, 4.03)   | 2.46**<br>(1.57, 3.37) | 0.50*<br>(0.11, 0.90)  | 1.75**<br>(1.15, 2.34) | 1.89**<br>(1.10, 2.69) |
| lag4  | 1.69<br>(-0.35, 3.78)   | 2.62**<br>(1.74, 3.50) | 0.33<br>(-0.06, 0.72)  | 1.71**<br>(1.12, 2.30) | 1.56**<br>(0.78, 2.34) |
| lag5  | 2.47*<br>(0.43, 4.55)   | 2.28**<br>(1.40, 3.17) | 0.19<br>(-0.20, 0.58)  | 1.74**<br>(1.16, 2.33) | 1.56**<br>(0.78, 2.34) |
| lag6  | 3.83**<br>(1.78, 5.92)  | 2.50**<br>(1.62, 3.39) | 0.20<br>(-0.20, 0.59)  | 1.62**<br>(1.05, 2.20) | 1.96**<br>(1.19, 2.73) |
| lag7  | 3.52**<br>(1.49, 5.60)  | 2.27**<br>(1.40, 3.15) | 0.12<br>(-0.27, 0.51)  | 1.44**<br>(0.86, 2.02) | 1.67**<br>(0.90, 2.44) |
| lag01 | 1.80<br>(-0.80, 4.48)   | 3.24**<br>(2.12, 4.37) | 0.59*<br>(0.04, 1.15)  | 1.88**<br>(1.12, 2.63) | 2.47**<br>(1.50, 3.45) |
| lag02 | 3.08*<br>(0.13, 6.12)   | 4.13**<br>(2.90, 5.37) | 0.81**<br>(0.23, 1.39) | 2.54**<br>(1.71, 3.37) | 3.18**<br>(2.11, 4.27) |
| lag03 | 3.72*<br>(0.49, 7.07)   | 4.89**<br>(3.56, 6.23) | 0.96**<br>(0.36, 1.58) | 3.13**<br>(2.24, 4.02) | 3.74**<br>(2.57, 4.92) |
| lag04 | 4.08*<br>(0.64, 7.63)   | 5.56**<br>(4.17, 6.98) | 1.02**<br>(0.38, 1.65) | 3.55**<br>(2.61, 4.50) | 4.02**<br>(2.78, 5.27) |
| lag05 | 4.99**<br>(1.34, 8.78)  | 6.17**<br>(4.69, 7.66) | 1.01**<br>(0.35, 1.67) | 4.10**<br>(3.11, 5.10) | 4.44**<br>(3.13, 5.78) |
| lag06 | 6.61**<br>(2.72, 10.65) | 6.92**<br>(5.36, 8.50) | 1.03**<br>(0.34, 1.73) | 4.65**<br>(3.60, 5.71) | 5.13**<br>(3.74, 6.54) |
| lag07 | 7.91**<br>(3.82, 12.16) | 7.55**<br>(5.93, 9.20) | 1.04**<br>(0.32, 1.77) | 5.06**<br>(3.96, 6.17) | 5.58**<br>(4.13, 7.06) |

\* Significant difference ( $p < 0.05$ ); \*\*Significant difference ( $p < 0.01$ )

Table S9. Estimated percentage increase [ER (95%CI)] in emergency department visits for pneumonia in boys and girls associated with 10µg/m<sup>3</sup> increases in SO<sub>2</sub>, NO<sub>2</sub>, O<sub>3</sub>, PM<sub>10</sub> and PM<sub>2.5</sub> concentrations in Guangzhou, China, related to Figure 3.

|             | SO <sub>2</sub><br>ER %(95%CI)     | NO <sub>2</sub><br>ER% (95%CI) | O <sub>3</sub><br>ER% (95%CI) | PM <sub>10</sub><br>ER% (95%CI)     | PM <sub>2.5</sub><br>ER% (95%CI)    |
|-------------|------------------------------------|--------------------------------|-------------------------------|-------------------------------------|-------------------------------------|
| <b>Boy</b>  |                                    |                                |                               |                                     |                                     |
| lag0        | 3.54*<br>(0.25, 6.94)              | 4.42**<br>(2.97, 5.88)         | 1.02**<br>(0.28, 1.76)        | 1.75**<br>(0.79, 2.71)              | 2.38**<br>(1.15, 3.63)              |
| lag1        | 5.18**<br>(1.97, 8.50)             | 4.01**<br>(2.60, 5.43)         | 0.95**<br>(0.33, 1.57)        | 1.77**<br>(0.84, 2.71)              | 2.45**<br>(1.23, 3.68)              |
| lag2        | 3.88*<br>(0.74, 7.12)              | 4.21**<br>(2.86, 5.57)         | 1.15**<br>(0.58, 1.72)        | 2.00**<br>(1.10, 2.91)              | 2.15**<br>(0.96, 3.35)              |
| lag3        | 3.40*<br>(0.30, 6.60)              | 3.09**<br>(1.76, 4.43)         | 0.98**<br>(0.42, 1.55)        | 1.74**<br>(0.87, 2.62)              | 1.91**<br>(0.75, 3.10)              |
| lag4        | 1.39<br>(-1.62, 4.49)              | 2.97**<br>(1.67, 4.30)         | 0.72*<br>(0.16, 1.29)         | 1.28**<br>(0.41, 2.16)              | 1.45*<br>(0.29, 2.62)               |
| lag5        | <sup>a</sup> 1.50<br>(-1.49, 4.57) | 2.93**<br>(1.63, 4.25)         | 0.67*<br>(0.11, 1.23)         | <sup>a</sup> 1.42**<br>(0.55, 2.29) | 1.67**<br>(0.52, 2.84)              |
| lag6        | 2.57<br>(-0.43, 5.66)              | 2.82**<br>(1.52, 4.13)         | 0.44<br>(-0.12, 1.01)         | 1.78**<br>(0.93, 2.64)              | 2.23**<br>(1.09, 3.37)              |
| lag7        | 3.21*<br>(0.21, 6.30)              | 2.86**<br>(1.56, 4.17)         | 0.22<br>(-0.35, 0.79)         | 1.70**<br>(0.85, 2.56)              | 2.28**<br>(1.15, 3.43)              |
| lag01       | 6.23**<br>(2.31, 10.27)            | 5.58**<br>(3.93, 7.26)         | 1.39**<br>(0.59, 2.20)        | 2.38**<br>(1.27, 3.49)              | 3.27**<br>(1.83, 4.73)              |
| lag02       | 7.72**<br>(3.28, 12.35)            | 6.97**<br>(5.16, 8.82)         | 1.83**<br>(0.99, 2.67)        | 3.13**<br>(1.91, 4.36)              | 3.93**<br>(2.33, 5.56)              |
| lag03       | 8.90**<br>(3.99, 14.04)            | 7.72**<br>(5.75, 9.73)         | 2.09**<br>(1.21, 2.97)        | 3.67**<br>(2.35, 5.00)              | 4.47**<br>(2.73, 6.25)              |
| lag04       | 8.78**<br>(3.53, 14.29)            | 8.33**<br>(6.24, 10.47)        | 2.23**<br>(1.31, 3.15)        | 3.88**<br>(2.48, 5.31)              | <sup>a</sup> 4.73**<br>(2.86, 6.63) |
| lag05       | 8.93**<br>(3.38, 14.79)            | 9.06**<br>(6.84, 11.33)        | 2.37**<br>(1.40, 3.34)        | <sup>a</sup> 4.31**<br>(2.81, 5.83) | <sup>a</sup> 5.25**<br>(3.25, 7.30) |
| lag06       | 9.73**<br>(3.85, 15.94)            | 9.78**<br>(7.44, 12.18)        | 2.44**<br>(1.43, 3.47)        | <sup>a</sup> 4.96**<br>(3.36, 6.57) | <sup>a</sup> 6.10**<br>(3.96, 8.27) |
| lag07       | 10.94**<br>(4.73, 17.52)           | 10.58**<br>(8.11, 13.10)       | 2.47**<br>(1.39, 3.55)        | <sup>a</sup> 5.62**<br>(3.94, 7.34) | <sup>a</sup> 6.99**<br>(4.74, 9.30) |
| <b>Girl</b> |                                    |                                |                               |                                     |                                     |
| lag0        | 1.86<br>(-1.94, 5.80)              | 3.36**<br>(1.67, 5.09)         | 1.18**<br>(0.32, 2.05)        | 2.13**<br>(1.00, 3.27)              | 3.02**<br>(1.57, 4.49)              |
| lag1        | 5.79**<br>(2.03, 9.69)             | 4.30**<br>(2.65, 5.97)         | 1.20**<br>(0.47, 1.93)        | 2.96**<br>(1.86, 4.06)              | 4.18**<br>(2.76, 5.62)              |
| lag2        | 5.05**<br>(1.36, 8.86)             | 4.10**<br>(2.52, 5.70)         | 0.56<br>(-0.12, 1.25)         | 2.66**<br>(1.61, 3.73)              | 3.58**<br>(2.19, 4.98)              |

|       |                                     |                          |                        |                                      |                                       |
|-------|-------------------------------------|--------------------------|------------------------|--------------------------------------|---------------------------------------|
| lag3  | 5.40**<br>(1.74, 9.19)              | 4.27**<br>(2.73, 5.84)   | 1.16**<br>(0.49, 1.83) | 2.53**<br>(1.50, 3.57)               | 2.72**<br>(1.35, 4.11)                |
| lag4  | 4.94**<br>(1.36, 8.65)              | 3.79**<br>(2.27, 5.34)   | 0.91**<br>(0.24, 1.58) | 2.56**<br>(1.55, 3.59)               | 2.89**<br>(1.54, 4.26)                |
| lag5  | <sup>a</sup> 6.27**<br>(2.70, 9.96) | 3.80**<br>(2.28, 5.34)   | 0.97**<br>(0.31, 1.63) | <sup>a</sup> 2.76**<br>(1.75, 3.79)  | 3.03**<br>(1.69, 4.40)                |
| lag6  | 4.70**<br>(1.17, 8.36)              | 3.88**<br>(2.36, 5.41)   | 0.77*<br>(0.10, 1.43)  | 2.74**<br>(1.74, 3.76)               | 3.05**<br>(1.72, 4.39)                |
| lag7  | 4.73**<br>(1.20, 8.39)              | 3.33**<br>(1.81, 4.86)   | 0.40<br>(-0.27, 1.08)  | 2.51**<br>(1.51, 3.52)               | 3.64**<br>(2.32, 4.98)                |
| lag01 | 5.52*<br>(0.98, 10.27)              | 5.11**<br>(3.17, 7.08)   | 1.70**<br>(0.76, 2.64) | 3.47**<br>(2.17, 4.79)               | 4.93**<br>(3.24, 6.65)                |
| lag02 | 7.87**<br>(2.69, 13.32)             | 6.53**<br>(4.39, 8.71)   | 1.64**<br>(0.66, 2.63) | 4.41**<br>(2.97, 5.87)               | 6.13**<br>(4.25, 8.04)                |
| lag03 | 10.34**<br>(4.56, 16.45)            | 8.00**<br>(5.68, 10.36)  | 2.04**<br>(1.01, 3.08) | 5.26**<br>(3.70, 6.84)               | 6.90**<br>(4.84, 9.00)                |
| lag04 | 12.35**<br>(6.06, 19.01)            | 9.04**<br>(6.58, 11.57)  | 2.29**<br>(1.20, 3.39) | 6.06**<br>(4.40, 7.75)               | <sup>a</sup> 7.81**<br>(5.59, 10.07)  |
| lag05 | 15.21**<br>(8.41, 22.43)            | 10.19**<br>(7.57, 12.87) | 2.59**<br>(1.45, 3.75) | <sup>a</sup> 7.13**<br>(5.35, 8.95)  | <sup>a</sup> 8.98**<br>(6.60, 11.42)  |
| lag06 | 16.98**<br>(9.74, 24.70)            | 11.35**<br>(8.58, 14.20) | 2.81**<br>(1.60, 4.03) | <sup>a</sup> 8.19**<br>(6.30, 10.13) | <sup>a</sup> 10.10**<br>(7.60, 12.70) |
| lag07 | 18.70**<br>(11.00, 26.80)           | 12.24**<br>(9.33, 15.23) | 2.91**<br>(1.64, 4.20) | <sup>a</sup> 9.09**<br>(7.08, 11.14) | <sup>a</sup> 11.46**<br>(8.78, 14.20) |

<sup>a</sup> The difference between the boy and girl subgroup was statistically significant.

\* Significant difference ( $p < 0.05$ ); \*\*Significant difference ( $p < 0.01$ )

Table S10. Estimated percentage increase [ER (95%CI)] in emergency department visits for asthma in boys and girls associated with 10µg/m<sup>3</sup> increases in SO<sub>2</sub>, NO<sub>2</sub>, O<sub>3</sub>, PM<sub>10</sub> and PM<sub>2.5</sub> concentrations in Guangzhou, China, related to Figure 3.

|             | SO <sub>2</sub><br>ER %(95%CI) | NO <sub>2</sub><br>ER% (95%CI) | O <sub>3</sub><br>ER% (95%CI) | PM <sub>10</sub><br>ER% (95%CI) | PM <sub>2.5</sub><br>ER% (95%CI) |
|-------------|--------------------------------|--------------------------------|-------------------------------|---------------------------------|----------------------------------|
| <b>Boy</b>  |                                |                                |                               |                                 |                                  |
| lag0        | 3.01<br>(-1.30, 7.52)          | 2.72**<br>(0.83, 4.66)         | 0.29<br>(-0.54, 1.13)         | 1.16<br>(-0.14, 2.47)           | 0.74<br>(-0.93, 2.44)            |
| lag1        | 2.13<br>(-2.04, 6.47)          | 2.69**<br>(0.83, 4.58)         | 0.14<br>(-0.68, 0.97)         | 0.87<br>(-0.39, 2.15)           | 0.43<br>(-1.22, 2.10)            |
| lag2        | 3.03<br>(-1.09, 7.32)          | 2.15*<br>(0.36, 3.98)          | 0.43<br>(-0.35, 1.20)         | 1.10<br>(-0.12, 2.34)           | 0.15<br>(-1.46, 1.78)            |
| lag3        | 0.54<br>(-3.46, 4.71)          | 0.85<br>(-0.91, 2.64)          | 0.14<br>(-0.62, 0.90)         | 0.52<br>(-0.68, 1.73)           | -0.14<br>(-1.72, 1.47)           |
| lag4        | 0.64<br>(-3.35, 4.79)          | 0.51<br>(-1.24, 2.28)          | 0.31<br>(-0.45, 1.07)         | 0.47<br>(-0.72, 1.69)           | 0.11<br>(-1.46, 1.71)            |
| lag5        | 1.70<br>(-2.29, 5.87)          | 0.76<br>(-0.98, 2.53)          | 0.38<br>(-0.37, 1.14)         | 0.74<br>(-0.46, 1.95)           | 0.27<br>(-1.30, 1.87)            |
| lag6        | 0.05<br>(-3.89, 4.17)          | 1.09<br>(-0.65, 2.86)          | -0.01<br>(-0.76, 0.74)        | 0.38<br>(-0.80, 1.58)           | 0.09<br>(-1.47, 1.68)            |
| lag7        | -2.56<br>(-6.39, 1.44)         | 0.13<br>(-1.59, 1.88)          | -0.39<br>(-1.14, 0.37)        | -0.12<br>(-1.30, 1.07)          | 0.51<br>(-2.05, 1.06)            |
| lag01       | 3.59<br>(-1.45, 8.87)          | 3.58**<br>(1.41, 5.80)         | -0.16<br>(-1.22, 0.90)        | 1.36<br>(-0.13, 2.87)           | 0.78<br>(-1.13, 2.73)            |
| lag02       | 4.85<br>(-0.80, 10.83)         | 4.14**<br>(1.74, 6.59)         | 0.17<br>(-0.93, 1.29)         | 1.73*<br>(0.10, 3.38)           | 0.70<br>(-1.39, 2.83)            |
| lag03       | 4.69<br>(-1.43, 11.19)         | 4.07**<br>(1.49, 6.72)         | 0.22<br>(-0.94, 1.39)         | 1.79*<br>(0.05, 3.57)           | 0.58<br>(-1.67, 2.88)            |
| lag04       | 4.62<br>(-1.93, 11.61)         | 3.90**<br>(1.16, 6.72)         | 0.36<br>(-0.86, 1.59)         | 1.82<br>(-0.03, 3.71)           | 0.56<br>(-1.83, 3.01)            |
| lag05       | 5.15<br>(-1.84, 12.64)         | 3.94**<br>(1.04, 6.92)         | 0.51<br>(-0.77, 1.81)         | 2.01*<br>(0.04, 4.01)           | 0.61<br>(-1.92, 3.21)            |
| lag06       | 4.92<br>(-2.44, 12.84)         | 4.18**<br>(1.13, 7.32)         | 0.47<br>(-0.87, 1.84)         | 2.05<br>(-0.01, 4.16)           | 0.61<br>(-2.06, 3.35)            |
| lag07       | 3.03<br>(-4.51, 11.16)         | 3.93*<br>(0.77, 7.18)          | 0.28<br>(-1.12, 1.70)         | 1.73<br>(-0.42, 3.92)           | 0.13<br>(-2.63, 2.98)            |
| <b>Girl</b> |                                |                                |                               |                                 |                                  |
| lag0        | 5.35<br>(-0.56, 11.61)         | 1.45<br>(-1.09, 4.05)          | 0.42<br>(-0.88, 1.74)         | 0.62<br>(-1.12, 2.40)           | 1.06<br>(-1.17, 3.35)            |
| lag1        | -0.04<br>(-5.58, 5.83)         | 0.63<br>(-1.85, 3.17)          | 0.66<br>(-0.46, 1.79)         | 0.24<br>(-1.45, 1.97)           | -0.06<br>(-2.26, 2.19)           |
| lag2        | -1.08<br>(-6.46, 4.60)         | 1.19<br>(-1.20, 3.63)          | -0.10<br>(-1.14, 0.96)        | 0.62<br>(-1.02, 2.28)           | 0.08<br>(-0.06, 2.26)            |

|       |                        |                       |                        |                       |                       |
|-------|------------------------|-----------------------|------------------------|-----------------------|-----------------------|
| lag3  | 0.46<br>(-4.92, 6.15)  | 1.87<br>(-0.49, 4.30) | 0.33<br>(-0.70, 1.37)  | 1.10<br>(-0.51, 2.73) | 1.46<br>(-0.66, 3.62) |
| lag4  | 3.07<br>(-2.35, 8.79)  | 1.69<br>(-0.66, 4.10) | 0.22<br>(-0.80, 1.25)  | 0.91<br>(-0.69, 2.54) | 0.87<br>(-1.23, 3.02) |
| lag5  | 1.40<br>(-3.95, 7.05)  | 2.83*<br>(0.47, 5.24) | -0.04<br>(-1.06, 0.99) | 0.94<br>(-0.66, 2.57) | 0.39<br>(-1.71, 2.54) |
| lag6  | -1.95<br>(-7.16, 3.56) | 1.99<br>(-0.35, 4.38) | -0.03<br>(-1.04, 0.99) | 1.08<br>(-0.50, 2.70) | 1.19<br>(-0.90, 3.33) |
| lag7  | 0.36<br>(-4.91, 5.92)  | 1.28<br>(-1.05, 3.66) | -0.64<br>(-1.66, 0.39) | 0.90<br>(-0.68, 2.51) | 1.12<br>(-0.96, 3.25) |
| lag01 | 3.59<br>(-3.18, 10.84) | 1.35<br>(-1.52, 4.32) | 0.78<br>(-0.64, 2.22)  | 0.58<br>(-1.41, 2.60) | 0.66<br>(-1.89, 3.27) |
| lag02 | 2.27<br>(-5.15, 10.27) | 1.77<br>(-1.38, 5.03) | 0.50<br>(-0.99, 2.01)  | 0.82<br>(-1.35, 3.02) | 0.56<br>(-2.21, 3.42) |
| lag03 | 2.24<br>(-5.79, 10.95) | 2.51<br>(-0.91, 6.04) | 0.60<br>(-0.96, 2.19)  | 1.26<br>(-1.05, 3.64) | 1.21<br>(-1.78, 4.29) |
| lag04 | 3.87<br>(-4.81, 13.34) | 3.15<br>(-0.49, 6.93) | 0.65<br>(-0.99, 2.33)  | 1.64<br>(-0.82, 4.16) | 1.60<br>(-1.58, 4.88) |
| lag05 | 4.35<br>(-4.87, 14.47) | 4.19*<br>(0.32, 8.22) | 0.58<br>(-1.14, 2.33)  | 1.95<br>(-0.65, 4.63) | 1.68<br>(-1.69, 5.16) |
| lag06 | 3.11<br>(-6.49, 13.68) | 4.77*<br>(0.69, 9.02) | 0.53<br>(-1.28, 2.36)  | 2.27<br>(-0.47, 5.09) | 2.04<br>(-1.51, 5.72) |
| lag07 | 3.22<br>(-6.82, 14.34) | 5.08*<br>(0.80, 9.53) | 0.23<br>(-1.65, 2.16)  | 2.57<br>(-0.31, 5.53) | 2.43<br>(-1.29, 6.30) |

\* Significant difference ( $p < 0.05$ ); \*\*Significant difference ( $p < 0.01$ )



Table S11. Estimated percentage increase [ER (95%CI)] in emergency department visits for total respiratory diseases in children aged 0-5 and 6-14 associated with 10µg/m<sup>3</sup> increases in SO<sub>2</sub>, NO<sub>2</sub>, O<sub>3</sub>, PM<sub>10</sub> and PM<sub>2.5</sub> concentrations in Guangzhou, China, related to Figure 4.

|                | SO <sub>2</sub>          | NO <sub>2</sub>                     | O <sub>3</sub>                      | PM <sub>10</sub>                    | PM <sub>2.5</sub>      |
|----------------|--------------------------|-------------------------------------|-------------------------------------|-------------------------------------|------------------------|
|                | ER %(95%CI)              | ER% (95%CI)                         | ER% (95%CI)                         | ER% (95%CI)                         | ER% (95%CI)            |
| 0-5 years old  |                          |                                     |                                     |                                     |                        |
| lag0           | 3.21**<br>(1.73, 4.71)   | 2.59**<br>(1.94, 3.25)              | 0.34*<br>(0.01, 0.68)               | <sup>a</sup> 1.68**<br>(1.24, 2.12) | 2.04**<br>(1.49, 2.61) |
| lag1           | 3.46**<br>(2.02, 4.91)   | 2.51**<br>(1.88, 3.16)              | 0.56**<br>(0.27, 0.84)              | 1.61**<br>(1.18, 2.04)              | 2.01**<br>(1.45, 2.57) |
| lag2           | 3.36**<br>(1.95, 4.79)   | 2.25**<br>(1.63, 2.87)              | 0.48**<br>(0.22, 0.74)              | 1.52**<br>(1.10, 1.93)              | 1.73**<br>(1.18, 2.27) |
| lag3           | 2.76**<br>(1.37, 4.16)   | 1.95**<br>(1.35, 2.55)              | 0.35**<br>(0.09, 0.60)              | 1.40**<br>(1.01, 1.81)              | 1.47**<br>(0.94, 2.01) |
| lag4           | 2.13**<br>(0.78, 3.50)   | 1.85**<br>(1.26, 2.44)              | 0.14<br>(-0.12, 0.39)               | 1.24**<br>(0.85, 1.64)              | 1.19**<br>(0.66, 1.72) |
| lag5           | 2.61**<br>(1.27, 3.97)   | 1.82**<br>(1.23, 2.42)              | <sup>a</sup> 0.03<br>(-0.23, 0.28)  | 1.26**<br>(0.87, 1.66)              | 1.28**<br>(0.76, 1.81) |
| lag6           | 4.06**<br>(2.72, 5.43)   | <sup>a</sup> 2.00**<br>(1.42, 2.60) | <sup>a</sup> 0.02<br>(-0.23, 0.28)  | 1.41**<br>(1.02, 1.80)              | 1.64**<br>(1.13, 2.16) |
| lag7           | 3.58**<br>(2.25, 4.94)   | <sup>a</sup> 1.78**<br>(1.20, 2.37) | -0.02<br>(-0.28, 0.24)              | 1.33**<br>(0.94, 1.72)              | 1.59**<br>(1.08, 2.11) |
| lag01          | 4.73**<br>(2.98, 6.51)   | 3.38**<br>(2.63, 4.12)              | 0.67**<br>(0.30, 1.03)              | <sup>a</sup> 2.22**<br>(1.72, 2.72) | 2.72**<br>(2.07, 3.37) |
| lag02          | 6.12**<br>(4.14, 8.13)   | 4.04**<br>(3.23, 4.86)              | 0.83**<br>(0.45, 1.21)              | <sup>a</sup> 2.68**<br>(2.13, 3.23) | 3.18**<br>(2.47, 3.90) |
| lag03          | 6.93**<br>(4.77, 9.14)   | 4.53**<br>(3.65, 5.40)              | 0.89**<br>(0.50, 1.29)              | 3.03**<br>(2.44, 3.63)              | 3.49**<br>(2.71, 4.26) |
| lag04          | 7.47**<br>(5.15, 9.85)   | 4.93**<br>(4.00, 5.87)              | 0.86**<br>(0.45, 1.28)              | 3.31**<br>(2.69, 3.94)              | 3.71**<br>(2.88, 4.54) |
| lag05          | 8.31**<br>(5.84, 10.85)  | 5.38**<br>(4.40, 6.37)              | <sup>a</sup> 0.80**<br>(0.36, 1.24) | 3.66**<br>(3.00, 4.32)              | 4.04**<br>(3.16, 4.92) |
| lag06          | 9.97**<br>(7.34, 12.67)  | 5.96**<br>(4.93, 7.00)              | <sup>a</sup> 0.76**<br>(0.30, 1.22) | 4.13**<br>(3.43, 4.83)              | 4.61**<br>(3.68, 5.54) |
| lag07          | 11.29**<br>(8.52, 14.12) | 6.45**<br>(5.37, 7.53)              | <sup>a</sup> 0.72**<br>(0.24, 1.20) | 4.54**<br>(3.81, 5.27)              | 5.09**<br>(4.12, 6.07) |
| 6-14 years old |                          |                                     |                                     |                                     |                        |
| lag0           | 4.45**<br>(2.59, 6.34)   | 2.99**<br>(2.15, 3.83)              | 0.12<br>(-0.32, 0.56)               | 2.48**<br>(1.94, 3.02)              | 2.58**<br>(1.88, 3.27) |
| lag1           | 4.23**<br>(2.44, 6.05)   | 2.63**<br>(1.81, 3.45)              | 0.26<br>(-0.11, 0.63)               | 2.20**<br>(1.67, 2.74)              | 2.54**<br>(1.85, 3.23) |
| lag2           | 3.81**<br>(2.06, 5.58)   | 2.16**<br>(1.38, 2.94)              | 0.25<br>(-0.09, 0.59)               | 1.86**<br>(1.36, 2.38)              | 2.13**<br>(1.46, 2.80) |

|       |                         |                        |                           |                        |                        |
|-------|-------------------------|------------------------|---------------------------|------------------------|------------------------|
| lag3  | 2.49**<br>(0.79, 4.22)  | 1.76**<br>(1.01, 2.52) | 0.05<br>(-0.29, 0.38)     | 1.41**<br>(0.92, 1.91) | 1.50**<br>(0.85, 2.15) |
| lag4  | 1.75*<br>(0.11, 3.43)   | 1.39**<br>(0.65, 2.13) | -0.25<br>(-0.58, 0.07)    | 1.00**<br>(0.52, 1.49) | 0.88**<br>(0.24, 1.52) |
| lag5  | 1.65*<br>(0.03, 3.31)   | 1.03**<br>(0.29, 1.77) | -0.40*<br>(-0.72, -0.07)  | 0.78**<br>(0.29, 1.26) | 0.63<br>(-0.004, 1.27) |
| lag6  | 2.47**<br>(0.84, 4.13)  | 1.01**<br>(0.28, 1.75) | -0.46**<br>(-0.78, -0.13) | 0.92**<br>(0.44, 1.40) | 0.99**<br>(0.36, 1.62) |
| lag7  | 2.15**<br>(0.53, 3.80)  | 0.82*<br>(0.09, 1.55)  | -0.36*<br>(-0.68, -0.03)  | 0.82**<br>(0.35, 1.30) | 0.98**<br>(0.36, 1.61) |
| lag01 | 6.14**<br>(3.95, 8.38)  | 3.74**<br>(2.79, 4.70) | 0.29<br>(-0.18, 0.77)     | 3.15**<br>(2.53, 3.77) | 3.43**<br>(2.63, 4.23) |
| lag02 | 7.56**<br>(5.09, 10.09) | 4.33**<br>(3.28, 5.38) | 0.40<br>(-0.09, 0.90)     | 3.63**<br>(2.95, 4.31) | 3.95**<br>(3.07, 4.83) |
| lag03 | 7.82**<br>(5.14, 10.58) | 4.62**<br>(3.50, 5.75) | 0.37<br>(-0.14, 0.89)     | 3.80**<br>(3.07, 4.53) | 4.09**<br>(3.14, 5.04) |
| lag04 | 7.88**<br>(5.01, 10.82) | 4.72**<br>(3.54, 5.91) | 0.19<br>(-0.35, 0.73)     | 3.81**<br>(3.04, 4.58) | 4.01**<br>(3.00, 5.04) |
| lag05 | 7.97**<br>(4.95, 11.08) | 4.75**<br>(3.51, 6.00) | -0.04<br>(-0.60, 0.52)    | 3.83**<br>(3.01, 4.65) | 3.94**<br>(2.96, 5.03) |
| lag06 | 8.70**<br>(5.50, 12.00) | 4.89**<br>(3.59, 6.21) | -0.26<br>(-0.84, 0.33)    | 4.04**<br>(3.17, 4.91) | 4.18**<br>(3.03, 5.33) |
| lag07 | 9.20**<br>(5.87, 12.65) | 4.98**<br>(3.62, 6.35) | -0.41<br>(-1.02, 0.20)    | 4.20**<br>(3.30, 5.12) | 4.38**<br>(3.18, 5.59) |

<sup>a</sup> The difference between the 0-5 and 6-14 years old subgroup was statistically significant.

\* Significant difference ( $p < 0.05$ ); \*\*Significant difference ( $p < 0.01$ )

Table S12. Estimated percentage increase [ER (95%CI)] in emergency department visits for acute upper respiratory infection in children aged 0-5 and 6-14 associated with 10 $\mu$ g/m<sup>3</sup> increases in SO<sub>2</sub>, NO<sub>2</sub>, O<sub>3</sub>, PM<sub>10</sub> and PM<sub>2.5</sub> concentrations in Guangzhou, China, related to Figure 4.

|                | SO <sub>2</sub>          | NO <sub>2</sub>                     | O <sub>3</sub>                      | PM <sub>10</sub>                    | PM <sub>2.5</sub>      |
|----------------|--------------------------|-------------------------------------|-------------------------------------|-------------------------------------|------------------------|
|                | ER % (95%CI)             | ER% (95%CI)                         | ER% (95%CI)                         | ER% (95%CI)                         | ER% (95%CI)            |
| 0-5 years old  |                          |                                     |                                     |                                     |                        |
| lag0           | 4.36**<br>(2.60, 6.15)   | 2.63**<br>(1.84, 3.43)              | 0.41*<br>(0.01, 0.81)               | <sup>a</sup> 1.87**<br>(1.35, 2.40) | 2.14**<br>(1.47, 2.81) |
| lag1           | 4.43**<br>(2.73, 6.17)   | 2.52**<br>(1.74, 3.30)              | 0.59**<br>(0.26, 0.93)              | <sup>a</sup> 1.82**<br>(1.31, 2.34) | 2.03**<br>(1.36, 2.70) |
| lag2           | 3.68**<br>(2.01, 5.37)   | 1.90**<br>(1.15, 2.65)              | 0.45**<br>(0.14, 0.77)              | <sup>a</sup> 1.42**<br>(0.92, 1.92) | 1.56**<br>(0.91, 2.22) |
| lag3           | 2.45**<br>(0.81, 4.11)   | 1.56**<br>(0.83, 2.29)              | 0.30<br>(-0.01, 0.61)               | 1.41**<br>(0.93, 1.89)              | 1.55**<br>(0.92, 2.19) |
| lag4           | 2.41**<br>(0.81, 4.13)   | 1.42**<br>(0.70, 2.14)              | 0.05<br>(-0.26, 0.35)               | 1.20**<br>(0.73, 1.68)              | 1.21**<br>(0.89, 1.85) |
| lag5           | 2.15**<br>(0.56, 3.75)   | 1.23**<br>(0.51, 1.95)              | -0.09<br>(-0.36, 0.24)              | 1.07**<br>(0.60, 1.55)              | 1.05**<br>(0.43, 1.68) |
| lag6           | 3.70**<br>(2.11, 5.32)   | 1.60**<br>(0.89, 2.32)              | <sup>a</sup> -0.06<br>(-0.36, 0.24) | 1.28**<br>(0.82, 1.75)              | 1.57**<br>(0.96, 2.19) |
| lag7           | 3.41**<br>(1.83, 5.03)   | <sup>a</sup> 1.70**<br>(0.99, 2.42) | -0.11<br>(-0.42, 0.19)              | 1.26**<br>(0.79, 1.72)              | 1.64**<br>(1.02, 2.26) |
| lag01          | 6.28**<br>(4.19, 8.41)   | 3.41**<br>(2.51, 4.32)              | 0.74**<br>(0.31, 1.18)              | <sup>a</sup> 2.50**<br>(1.90, 3.10) | 2.80**<br>(2.03, 3.59) |
| lag02          | 7.64**<br>(5.28, 10.06)  | 3.88**<br>(2.88, 4.88)              | 0.87**<br>(0.42, 1.33)              | <sup>a</sup> 2.85**<br>(2.19, 3.52) | 3.17**<br>(2.31, 4.04) |
| lag03          | 8.07**<br>(5.48, 10.72)  | 4.17**<br>(3.09, 5.25)              | 0.91**<br>(0.43, 1.39)              | <sup>a</sup> 3.17**<br>(2.46, 3.89) | 3.51**<br>(2.58, 4.45) |
| lag04          | 8.67**<br>(5.89, 11.52)  | 4.40**<br>(3.26, 5.55)              | <sup>a</sup> 0.83**<br>(0.33, 1.34) | 3.42**<br>(2.66, 4.18)              | 3.75**<br>(2.75, 4.76) |
| lag05          | 9.13**<br>(6.18, 12.17)  | 4.60**<br>(3.40, 5.82)              | <sup>a</sup> 0.71**<br>(0.18, 1.23) | 3.66**<br>(2.86, 4.47)              | 3.97**<br>(2.90, 5.04) |
| lag06          | 10.52**<br>(7.39, 13.74) | 5.05**<br>(3.78, 6.33)              | <sup>a</sup> 0.63*<br>(0.08, 1.19)  | 4.08**<br>(3.23, 4.93)              | 4.51**<br>(3.38, 5.65) |
| lag07          | 11.76**<br>(8.46, 15.16) | 5.56**<br>(4.23, 6.91)              | <sup>a</sup> 0.56<br>(-0.02, 1.14)  | 4.51**<br>(3.61, 5.41)              | 5.08**<br>(3.89, 6.28) |
| 6-14 years old |                          |                                     |                                     |                                     |                        |
| lag0           | 4.99**<br>(2.81, 7.22)   | 3.16**<br>(2.16, 4.18)              | 0.10<br>(-0.42, 0.63)               | <sup>a</sup> 2.89**<br>(2.26, 3.52) | 2.90**<br>(2.09, 3.72) |
| lag1           | 4.63**<br>(2.53, 6.78)   | 2.71**<br>(1.73, 3.69)              | 0.14<br>(-0.31, 0.58)               | <sup>a</sup> 2.56**<br>(1.93, 3.19) | 2.81**<br>(2.00, 3.62) |
| lag2           | 4.41**<br>(2.37, 6.49)   | 2.41**<br>(1.48, 3.35)              | 0.12<br>(-0.29, 0.53)               | <sup>a</sup> 2.22**<br>(1.63, 2.82) | 2.52**<br>(1.73, 3.31) |

|       |                         |                                    |                                        |                                     |                        |
|-------|-------------------------|------------------------------------|----------------------------------------|-------------------------------------|------------------------|
| lag3  | 2.15*<br>(0.18, 4.15)   | 1.63**<br>(0.73, 2.53)             | -0.12<br>(-0.51, 0.28)                 | 1.47**<br>(0.89, 2.04)              | 1.74**<br>(0.98, 2.50) |
| lag4  | 1.92*<br>(0.01, 3.87)   | 1.09*<br>(0.21, 1.97)              | -0.42*<br>(-0.81, -0.02)               | 0.99**<br>(0.42, 1.56)              | 0.99**<br>(0.24, 1.74) |
| lag5  | 1.53<br>(-0.38, 3.42)   | 0.65<br>(-0.22, 1.53)              | -0.57**<br>(-0.95, -0.18)              | 0.75**<br>(0.18, 1.31)              | 0.65<br>(-0.09, 1.39)  |
| lag6  | 2.10*<br>(0.21, 4.02)   | 0.70<br>(-0.17, 1.57)              | <sup>a</sup> -0.63**<br>(-1.02, -0.24) | 0.90**<br>(0.35, 1.46)              | 1.00**<br>(0.28, 1.74) |
| lag7  | 2.16*<br>(0.28, 4.08)   | <sup>a</sup> 0.55<br>(-0.32, 1.42) | -0.43*<br>(-0.82, -0.04)               | 0.82**<br>(0.27, 1.38)              | 1.09**<br>(0.36, 1.82) |
| lag01 | 6.84**<br>(4.25, 9.49)  | 3.93**<br>(2.78, 5.10)             | 0.18<br>(-0.39, 0.76)                  | <sup>a</sup> 3.68**<br>(2.95, 4.42) | 3.84**<br>(2.90, 4.80) |
| lag02 | 8.54**<br>(5.63, 11.53) | 4.68**<br>(3.42, 5.95)             | 0.24<br>(-0.36, 0.84)                  | <sup>a</sup> 4.28**<br>(3.49, 5.09) | 4.51**<br>(3.47, 5.56) |
| lag03 | 8.31**<br>(5.16, 11.56) | 4.81**<br>(3.47, 6.17)             | 0.14<br>(-0.48, 0.76)                  | <sup>a</sup> 4.35**<br>(3.49, 5.21) | 4.66**<br>(3.53, 5.79) |
| lag04 | 8.41**<br>(5.05, 11.89) | 4.73**<br>(3.31, 6.17)             | <sup>a</sup> -0.11<br>(-0.75, 0.54)    | 4.31**<br>(3.39, 5.23)              | 4.61**<br>(3.40, 5.83) |
| lag05 | 8.25**<br>(4.71, 11.91) | 4.53**<br>(3.04, 6.04)             | <sup>a</sup> -0.41<br>(-1.08, 0.27)    | 4.25**<br>(3.28, 5.23)              | 4.46**<br>(3.17, 5.76) |
| lag06 | 8.72**<br>(5.00, 12.58) | 4.54**<br>(2.98, 6.12)             | <sup>a</sup> -0.69<br>(-1.39, 0.02)    | 4.44**<br>(3.42, 5.48)              | 4.71**<br>(3.34, 6.09) |
| lag07 | 9.26**<br>(5.36, 13.30) | 4.54**<br>(2.91, 6.19)             | <sup>a</sup> -0.86*<br>(-1.59, -0.12)  | 4.64**<br>(3.55, 5.74)              | 4.99**<br>(3.55, 6.45) |

<sup>a</sup> The difference between the 0-5 and 6-14 years old subgroup was statistically significant.

\* Significant difference ( $p < 0.05$ ); \*\*Significant difference ( $p < 0.01$ )

Table S13. Estimated percentage increase [ER (95%CI)] in emergency department visits for bronchitis in children aged 0-5 and 6-14 associated with 10µg/m<sup>3</sup> increases in SO<sub>2</sub>, NO<sub>2</sub>, O<sub>3</sub>, PM<sub>10</sub> and PM<sub>2.5</sub> concentrations in Guangzhou, China, related to Figure 4.

|                | SO <sub>2</sub>         | NO <sub>2</sub>        | O <sub>3</sub>                     | PM <sub>10</sub>                    | PM <sub>2.5</sub>                   |
|----------------|-------------------------|------------------------|------------------------------------|-------------------------------------|-------------------------------------|
|                | ER %(95%CI)             | ER% (95%CI)            | ER% (95%CI)                        | ER% (95%CI)                         | ER% (95%CI)                         |
| 0-5 years old  |                         |                        |                                    |                                     |                                     |
| lag0           | 1.20<br>(-0.76, 3.19)   | 2.53**<br>(1.68, 3.38) | 0.44*<br>(0.00, 0.89)              | 1.25**<br>(0.68, 1.82)              | 1.75**<br>(1.02, 2.49)              |
| lag1           | 2.31*<br>(0.41, 4.25)   | 2.64**<br>(1.82, 3.48) | 0.59**<br>(0.21, 0.96)             | 1.53**<br>(0.98, 2.09)              | 1.98**<br>(1.25, 2.71)              |
| lag2           | 2.50**<br>(0.63, 4.41)  | 2.45**<br>(1.65, 3.25) | 0.73**<br>(0.39, 1.08)             | 1.67**<br>(1.13, 2.20)              | 1.99**<br>(1.29, 2.70)              |
| lag3           | 1.95*<br>(0.10, 3.83)   | 2.29**<br>(1.51, 3.08) | 0.61**<br>(0.27, 0.95)             | 1.54**<br>(1.02, 2.06)              | 1.70**<br>(1.01, 2.40)              |
| lag4           | 1.88*<br>(0.08, 3.72)   | 2.49**<br>(1.72, 3.26) | 0.41*<br>(0.08, 0.75)              | 1.50**<br>(0.99, 2.02)              | 1.46**<br>(0.78, 2.15)              |
| lag5           | 3.41**<br>(1.61, 5.25)  | 2.44**<br>(1.67, 3.21) | 0.24<br>(-0.10, 0.58)              | 1.62**<br>(1.11, 2.14)              | 1.56**<br>(0.88, 2.25)              |
| lag6           | 4.26**<br>(2.46, 6.10)  | 2.49**<br>(1.72, 3.26) | 0.30<br>(-0.04, 0.64)              | 1.53**<br>(1.03, 2.04)              | 1.82**<br>(1.15, 2.49)              |
| lag7           | 4.16**<br>(2.37, 5.98)  | 2.18**<br>(1.42, 2.95) | <sup>a</sup> 0.26<br>(-0.08, 0.60) | <sup>a</sup> 1.60**<br>(1.10, 2.10) | <sup>a</sup> 1.83**<br>(1.16, 2.50) |
| lag01          | 2.49*<br>(0.19, 4.84)   | 3.42**<br>(2.45, 4.39) | 0.74**<br>(0.27, 1.22)             | 1.88**<br>(1.23, 2.54)              | 2.51**<br>(1.66, 3.36)              |
| lag02          | 3.65**<br>(1.05, 6.31)  | 4.18**<br>(3.12, 5.25) | 1.05**<br>(0.55, 1.55)             | 2.50**<br>(1.79, 3.22)              | 3.17**<br>(2.23, 4.11)              |
| lag03          | 4.26**<br>(1.42, 7.19)  | 4.83**<br>(3.68, 5.98) | 1.23**<br>(0.70, 1.75)             | 2.97**<br>(2.20, 3.75)              | 3.62**<br>(2.61, 4.64)              |
| lag04          | 4.78**<br>(1.74, 7.91)  | 5.49**<br>(4.28, 6.71) | 1.29**<br>(0.75, 1.84)             | 3.35**<br>(2.53, 4.17)              | 3.91**<br>(2.83, 5.00)              |
| lag05          | 6.21**<br>(2.96, 9.56)  | 6.19**<br>(4.91, 7.48) | 1.29**<br>(0.72, 1.86)             | 3.87**<br>(3.01, 4.74)              | 4.37**<br>(3.23, 5.53)              |
| lag06          | 8.02**<br>(4.56, 11.59) | 6.94**<br>(5.59, 8.31) | 1.34**<br>(0.74, 1.94)             | 4.38**<br>(3.47, 5.30)              | 4.99**<br>(3.78, 6.22)              |
| lag07          | 9.61**<br>(5.98, 13.37) | 7.54**<br>(6.13, 8.96) | 1.40**<br>(0.78, 2.03)             | 4.88**<br>(3.93, 5.84)              | 5.53**<br>(4.26, 6.81)              |
| 6-14 years old |                         |                        |                                    |                                     |                                     |
| lag0           | 2.03<br>(-0.49, 4.61)   | 2.96**<br>(1.82, 4.11) | 0.09<br>(-0.51, 0.69)              | 1.90**<br>(1.15, 2.65)              | 1.88**<br>(0.92, 2.84)              |
| lag1           | 3.69**<br>(1.24, 6.20)  | 2.74**<br>(1.64, 3.86) | 0.53*<br>(0.02, 1.03)              | 1.97**<br>(1.24, 2.70)              | 2.25**<br>(1.31, 3.20)              |
| lag2           | 2.63*<br>(0.24, 5.08)   | 2.05**<br>(0.99, 3.12) | 0.62**<br>(0.15, 1.09)             | 1.65**<br>(0.95, 2.36)              | 1.77**<br>(0.85, 2.70)              |

|       |                         |                        |                                     |                                    |                                    |
|-------|-------------------------|------------------------|-------------------------------------|------------------------------------|------------------------------------|
| lag3  | 2.24<br>(-0.12, 4.66)   | 2.01**<br>(0.97, 3.05) | 0.34<br>(-0.13, 0.80)               | 1.54**<br>(0.86, 2.22)             | 1.42**<br>(0.52, 2.33)             |
| lag4  | 1.52<br>(-0.77, 3.87)   | 2.21**<br>(1.20, 3.24) | 0.08<br>(-0.38, 0.54)               | 1.36**<br>(0.68, 2.03)             | 0.74<br>(-0.15, 1.63)              |
| lag5  | 1.85<br>(-0.43, 4.18)   | 1.53**<br>(0.51, 2.55) | -0.01<br>(-0.47, 0.44)              | 1.20**<br>(0.53, 1.88)             | 0.89*<br>(0.00, 1.78)              |
| lag6  | 3.52**<br>(1.22, 5.87)  | 1.68**<br>(0.67, 2.70) | -0.11<br>(-0.57, 0.35)              | 1.08**<br>(0.42, 1.74)             | 1.09*<br>(0.22, 1.97)              |
| lag7  | 2.07<br>(-0.21, 4.39)   | 1.27*<br>(0.26, 2.29)  | <sup>a</sup> -0.35<br>(-0.81, 0.11) | <sup>a</sup> 0.61<br>(-0.05, 1.28) | <sup>a</sup> 0.65<br>(-0.23, 1.53) |
| lag01 | 4.06**<br>(1.09, 7.12)  | 3.80**<br>(2.50, 5.12) | 0.49<br>(-0.16, 1.14)               | 2.60**<br>(1.75, 3.47)             | 2.77**<br>(1.67, 3.88)             |
| lag02 | 5.04**<br>(1.69, 8.51)  | 4.31**<br>(2.87, 5.76) | 0.80*<br>(0.12, 1.48)               | 3.06**<br>(2.12, 4.01)             | 3.22**<br>(2.00, 4.45)             |
| lag03 | 5.69**<br>(2.00, 9.51)  | 4.81**<br>(3.26, 6.38) | 0.86*<br>(0.15, 1.58)               | 3.46**<br>(2.45, 4.49)             | 3.51**<br>(2.19, 4.85)             |
| lag04 | 5.81**<br>(1.88, 9.89)  | 5.31**<br>(3.68, 6.97) | 0.80*<br>(0.05, 1.55)               | 3.46**<br>(2.45, 4.49)             | 3.43**<br>(2.01, 4.86)             |
| lag05 | 6.20**<br>(2.03, 10.53) | 5.55**<br>(3.83, 7.30) | 0.71<br>(-0.07, 1.49)               | 3.95**<br>(2.80, 5.10)             | 3.53**<br>(2.03, 5.06)             |
| lag06 | 7.42**<br>(3.03, 12.00) | 5.92**<br>(4.11, 7.75) | 0.60<br>(-0.21, 1.42)               | 4.17**<br>(2.96, 5.38)             | 3.76**<br>(2.18, 5.37)             |
| lag07 | 7.94**<br>(3.35, 12.74) | 6.15**<br>(4.26, 8.07) | 0.53<br>(-0.42, 1.28)               | 4.22**<br>(2.95, 5.50)             | 3.81**<br>(2.15, 5.50)             |

<sup>a</sup> The difference between the 0-5 and 6-14 years old subgroup was statistically significant.

\* Significant difference ( $p < 0.05$ ); \*\*Significant difference ( $p < 0.01$ )

Table S14. Estimated percentage increase [ER (95%CI)] in emergency department visits for pneumonia in children aged 0-5 and 6-14 associated with 10µg/m<sup>3</sup> increases in SO<sub>2</sub>, NO<sub>2</sub>, O<sub>3</sub>, PM<sub>10</sub> and PM<sub>2.5</sub> concentrations in Guangzhou, China, related to Figure 4.

|                | SO <sub>2</sub><br>ER %(95%CI) | NO <sub>2</sub><br>ER% (95%CI)       | O <sub>3</sub><br>ER% (95%CI) | PM <sub>10</sub><br>ER% (95%CI) | PM <sub>2.5</sub><br>ER% (95%CI) |
|----------------|--------------------------------|--------------------------------------|-------------------------------|---------------------------------|----------------------------------|
| 0-5 years old  |                                |                                      |                               |                                 |                                  |
| lag0           | 3.27*<br>(0.24, 6.40)          | 3.73**<br>(2.41, 5.06)               | 1.03**<br>(0.36, 1.71)        | 1.79**<br>(0.92, 2.68)          | 2.48**<br>(1.35, 3.62)           |
| lag1           | 6.92**<br>(3.93, 9.99)         | 4.28**<br>(3.00, 5.57)               | 0.96**<br>(0.40, 1.53)        | 2.42**<br>(1.57, 3.28)          | 3.16**<br>(2.05, 4.28)           |
| lag2           | 4.64**<br>(1.73, 7.64)         | 3.88**<br>(2.65, 5.13)               | 0.85**<br>(0.32, 1.37)        | 2.21**<br>(1.39, 3.03)          | 2.80**<br>(1.72, 3.90)           |
| lag3           | 4.04**<br>(1.17, 7.00)         | <sup>a</sup> 2.99**<br>(1.78, 4.21)  | 0.94**<br>(0.43, 1.46)        | 1.88**<br>(1.08, 2.69)          | 1.94**<br>(0.87, 3.03)           |
| lag4           | 2.48<br>(-0.31, 5.36)          | <sup>a</sup> 2.71**<br>(1.52, 3.92)  | 0.71**<br>(0.19, 1.22)        | 1.68**<br>(0.88, 2.48)          | 1.85**<br>(0.79, 2.92)           |
| lag5           | 2.52<br>(-0.25, 5.37)          | 2.74**<br>(1.54, 3.94)               | 0.78**<br>(0.27, 1.30)        | 1.84**<br>(1.05, 2.64)          | 1.97**<br>(0.91, 3.04)           |
| lag6           | 2.29<br>(-0.48, 5.13)          | 2.63**<br>(1.44, 3.83)               | 0.69**<br>(0.17, 1.20)        | 1.94**<br>(1.16, 2.73)          | 2.40**<br>(1.36, 3.46)           |
| lag7           | 3.03*<br>(0.26, 5.87)          | 2.40**<br>(1.21, 3.60)               | 0.30<br>(-0.22, 0.82)         | 1.66**<br>(0.88, 2.44)          | 2.53**<br>(1.49, 3.59)           |
| lag01          | 7.33**<br>(3.69, 11.10)        | 5.31**<br>(3.81, 6.84)               | 1.41**<br>(0.69, 2.15)        | 2.87**<br>(1.86, 3.89)          | 3.85**<br>(2.53, 5.18)           |
| lag02          | 9.18**<br>(5.04, 13.49)        | 6.54**<br>(4.89, 8.22)               | 1.63**<br>(0.87, 2.39)        | 3.66**<br>(2.54, 4.79)          | 4.81**<br>(3.34, 6.29)           |
| lag03          | 10.69**<br>(6.09, 15.48)       | 7.29**<br>(5.50, 9.11)               | 1.90**<br>(1.10, 2.70)        | 4.24**<br>(3.03, 5.46)          | 5.30**<br>(3.70, 6.92)           |
| lag04          | 11.18**<br>(6.24, 16.35)       | 7.85**<br>(5.95, 9.79)               | 2.05**<br>(1.21, 2.89)        | 4.66**<br>(3.38, 5.97)          | 5.76**<br>(4.04, 7.51)           |
| lag05          | 11.79**<br>(6.54, 17.30)       | <sup>a</sup> 8.53**<br>(6.51, 10.59) | 2.26**<br>(1.38, 3.14)        | 5.27**<br>(3.90, 6.66)          | 6.40**<br>(4.56, 8.28)           |
| lag06          | 12.40**<br>(6.85, 18.24)       | 9.23**<br>(7.09, 11.41)              | 2.45**<br>(1.53, 3.38)        | 6.01**<br>(4.55, 7.49)          | 7.35**<br>(5.39, 9.36)           |
| lag07          | 13.39**<br>(7.54, 19.56)       | 9.83**<br>(7.59, 12.12)              | 2.51**<br>(1.53, 3.49)        | 6.60**<br>(5.05, 8.17)          | 8.30**<br>(6.22, 10.42)          |
| 6-14 years old |                                |                                      |                               |                                 |                                  |
| lag0           | -0.04<br>(-4.66, 4.80)         | 3.90**<br>(1.72, 6.11)               | 0.16<br>(-0.98, 1.32)         | 1.53*<br>(0.08, 3.00)           | 1.49<br>(-0.35, 3.36)            |
| lag1           | 2.54<br>(-2.03, 7.32)          | 4.22**<br>(2.13, 6.36)               | 0.92<br>(-0.04, 1.89)         | 2.16**<br>(0.75, 3.58)          | 3.56**<br>(1.74, 5.40)           |
| lag2           | 4.35<br>(-0.20, 9.10)          | 5.13**<br>(3.12, 7.18)               | 0.64<br>(-0.25, 1.54)         | 2.48**<br>(1.13, 3.85)          | 2.53**<br>(0.76, 4.34)           |

|       |                |                      |               |              |               |
|-------|----------------|----------------------|---------------|--------------|---------------|
| lag3  | 5.45*          | <sup>a</sup> 5.69**  | 0.42          | 2.93**       | 3.55**        |
|       | (0.94, 10.16)  | (3.71, 7.70)         | (-0.47, 1.30) | (1.61, 4.26) | (1.81, 5.31)  |
| lag4  | 4.69*          | <sup>a</sup> 5.40**  | 0.55          | 2.60**       | 3.36**        |
|       | (0.24, 9.33)   | (3.44, 7.40)         | (-0.33, 1.44) | (1.29, 3.92) | (1.64, 5.11)  |
| lag5  | 5.41*          | 4.29**               | 0.10          | 1.77**       | 1.76*         |
|       | (1.00, 10.02)  | (2.34, 6.28)         | (-0.78, 0.98) | (0.46, 3.09) | (0.05, 3.50)  |
| lag6  | 4.37           | 2.87**               | 0.19          | 1.70**       | 1.22          |
|       | (-0.02, 8.94)  | (0.93, 4.84)         | (-0.69, 1.07) | (0.41, 3.00) | (-0.47, 2.93) |
| lag7  | 4.54*          | 2.19*                | 0.43          | 2.28**       | 2.28**        |
|       | (0.13, 9.13)   | (0.26, 4.16)         | (-0.44, 1.31) | (1.00, 3.58) | (0.59, 3.99)  |
| lag01 | 1.79           | 5.48**               | 0.87          | 2.51**       | 3.42**        |
|       | (-3.67, 7.56)  | (2.98, 8.04)         | (-0.38, 2.14) | (0.84, 4.21) | (1.28, 5.61)  |
| lag02 | 4.20           | 7.58**               | 1.11          | 3.51**       | 4.21**        |
|       | (-2.02, 10.82) | (4.81, 10.43)        | (-0.20, 2.43) | (1.66, 5.38) | (1.83, 6.64)  |
| lag03 | 6.90           | 9.77**               | 1.16          | 4.65**       | 5.59**        |
|       | (-0.06, 14.34) | (6.74, 12.89)        | (-0.21, 2.55) | (2.65, 6.68) | (2.99, 8.25)  |
| lag04 | 8.73*          | 11.44**              | 1.33          | 5.43**       | 6.70**        |
|       | (1.15, 16.88)  | (8.19, 14.79)        | (-0.12, 2.80) | (3.28, 7.61) | (3.89, 9.59)  |
| lag05 | 11.32**        | <sup>a</sup> 12.70** | 1.29          | 6.05**       | 7.33**        |
|       | (3.13, 20.16)  | (9.24, 16.26)        | (-0.23, 2.83) | (3.76, 8.39) | (4.32, 10.43) |
| lag06 | 12.75**        | 13.12**              | 1.30          | 6.45**       | 7.44**        |
|       | (4.05, 22.18)  | (9.49, 16.87)        | (-0.31, 2.92) | (4.03, 8.93) | (4.25, 10.73) |
| lag07 | 14.46**        | 13.37**              | 1.45          | 7.25**       | 8.13**        |
|       | (5.22, 24.51)  | (9.57, 17.30)        | (-0.24, 3.16) | (4.69, 9.87) | (4.78, 11.60) |

<sup>a</sup> The difference between the 0-5 and 6-14 years old subgroup was statistically significant.

\* Significant difference ( $p < 0.05$ ); \*\*Significant difference ( $p < 0.01$ )



Table S15. Estimated percentage increase [ER (95%CI)] in emergency department visits for asthma in children aged 0-5 and 6-14 associated with 10 $\mu\text{g}/\text{m}^3$  increases in SO<sub>2</sub>, NO<sub>2</sub>, O<sub>3</sub>, PM<sub>10</sub> and PM<sub>2.5</sub> concentrations in Guangzhou, China, related to Figure 4.

|                | SO <sub>2</sub>        | NO <sub>2</sub>         | O <sub>3</sub>        | PM <sub>10</sub>       | PM <sub>2.5</sub>      |
|----------------|------------------------|-------------------------|-----------------------|------------------------|------------------------|
|                | ER %(95%CI)            | ER% (95%CI)             | ER% (95%CI)           | ER% (95%CI)            | ER% (95%CI)            |
| 0-5 years old  |                        |                         |                       |                        |                        |
| lag0           | -0.86<br>(-7.30, 6.03) | 1.89<br>(-0.92, 4.78)   | 0.02<br>(-1.41, 1.47) | 0.57<br>(-1.35, 2.52)  | 0.99<br>(-1.48, 3.53)  |
| lag1           | -2.71<br>(-8.87, 3.86) | 2.99*<br>(0.21, 5.84)   | 0.26<br>(-0.96, 1.49) | 1.54<br>(-0.32, 3.44)  | 2.07<br>(-0.38, 4.58)  |
| lag2           | 0.50<br>(-5.71, 7.12)  | 3.93**<br>(1.15, 6.59)  | 0.26<br>(-0.88, 1.42) | 1.63<br>(-0.18, 3.47)  | 1.21<br>(-1.18, 3.65)  |
| lag3           | 3.78<br>(-2.50, 10.47) | 4.40**<br>(1.76, 7.11)  | 0.46<br>(-0.67, 1.59) | 1.95*<br>(0.18, 3.75)  | 1.81<br>(-0.53, 4.21)  |
| lag4           | 2.59<br>(-3.53, 9.10)  | 3.55**<br>(0.94, 6.24)  | 1.10<br>(-0.02, 2.22) | 1.56<br>(-0.20, 3.35)  | 1.15<br>(-1.18, 3.53)  |
| lag5           | 1.14<br>(-4.89, 7.55)  | 3.26*<br>(0.64, 5.94)   | 1.02<br>(-0.09, 2.14) | 1.14<br>(-0.63, 2.94)  | 1.49<br>(-0.85, 3.88)  |
| lag6           | 0.18<br>(-5.79, 6.53)  | 1.76<br>(-0.83, 4.42)   | 0.66<br>(-0.44, 1.78) | 1.23<br>(-0.51, 3.01)  | 2.02<br>(-0.29, 4.38)  |
| lag7           | 4.75<br>(-1.41, 11.29) | 2.77*<br>(0.19, 5.42)   | 0.29<br>(-0.82, 1.41) | 2.21*<br>(0.46, 3.98)  | 2.80*<br>(0.50, 5.16)  |
| lag01          | -2.50<br>(-9.82, 5.41) | 3.20**<br>(-0.01, 6.51) | 0.25<br>(-1.30, 1.83) | 1.44<br>(-0.75, 3.68)  | 2.06<br>(-0.79, 5.00)  |
| lag02          | -1.79<br>(-9.95, 7.10) | 4.78**<br>(1.23, 8.45)  | 0.36<br>(-1.26, 2.01) | 2.11<br>(-0.31, 4.58)  | 2.33<br>(-0.81, 5.57)  |
| lag03          | 0.57<br>(-8.43, 10.45) | 6.50**<br>(2.63, 10.51) | 0.56<br>(-1.14, 2.28) | 2.90*<br>(0.29, 5.57)  | 3.02<br>(-0.38, 6.54)  |
| lag04          | 1.96<br>(-7.73, 12.67) | 7.63**<br>(3.48, 11.95) | 1.06<br>(-0.73, 2.88) | 3.39*<br>(0.62, 6.24)  | 3.34<br>(-0.30, 7.10)  |
| lag05          | 1.95<br>(-8.28, 13.32) | 8.45**<br>(4.03, 13.06) | 1.43<br>(-0.45, 3.34) | 3.51*<br>(0.56, 6.54)  | 3.57<br>(-0.30, 7.58)  |
| lag06          | 2.02<br>(-8.72, 14.04) | 8.80**<br>(4.13, 13.67) | 1.65<br>(-0.33, 3.66) | 3.92*<br>(0.81, 7.12)  | 4.34*<br>(0.25, 8.60)  |
| lag07          | 4.05<br>(-7.40, 16.92) | 9.57**<br>(4.66, 14.71) | 1.72<br>(-0.36, 3.84) | 4.70**<br>(1.42, 8.09) | 5.35*<br>(1.03, 9.86)  |
| 6-14 years old |                        |                         |                       |                        |                        |
| lag0           | 3.93<br>(-0.07, 8.10)  | 2.20*<br>(0.44, 4.00)   | 0.39<br>(-0.51, 1.30) | 1.42*<br>(0.21, 2.65)  | 2.05**<br>(0.49, 3.63) |
| lag1           | 2.35<br>(-1.50, 6.35)  | 0.79<br>(-0.94, 2.54)   | 0.29<br>(-0.47, 1.07) | 0.79<br>(-0.39, 1.98)  | 0.57<br>(-0.96, 2.13)  |
| lag2           | 3.53<br>(-0.29, 7.49)  | 1.52<br>(-0.14, 3.21)   | 0.42<br>(-0.30, 1.15) | 1.28*<br>(0.14, 2.43)  | 0.87<br>(-0.63, 2.38)  |

|       |                        |                        |                       |                        |                        |
|-------|------------------------|------------------------|-----------------------|------------------------|------------------------|
| lag3  | 2.74<br>(-1.02, 6.64)  | 2.43**<br>(0.79, 4.09) | 0.35<br>(-0.36, 1.06) | 1.51**<br>(0.40, 2.64) | 1.50*<br>(0.03, 2.99)  |
| lag4  | 3.41<br>(-0.33, 7.29)  | 1.98*<br>(0.36, 3.63)  | 0.34<br>(-0.37, 1.05) | 1.18*<br>(0.07, 2.31)  | 0.79<br>(-0.67, 2.27)  |
| lag5  | -0.13<br>(-3.77, 3.65) | 0.60<br>(-1.02, 2.24)  | 0.27<br>(-0.43, 0.97) | 0.25<br>(-0.86, 1.38)  | -0.49<br>(-1.95, 0.98) |
| lag6  | -0.69<br>(-4.32, 3.08) | 0.39<br>(-1.22, 2.03)  | 0.39<br>(-0.31, 1.10) | 0.75<br>(-0.35, 1.86)  | 0.08<br>(-1.36, 1.55)  |
| lag7  | 0.01<br>(-3.61, 3.77)  | 0.00<br>(-1.60, 1.63)  | 0.28<br>(-0.43, 0.99) | 0.66<br>(-0.44, 1.77)  | 0.42<br>(-1.03, 1.88)  |
| lag01 | 4.37<br>(-0.30, 9.26)  | 1.96<br>(-0.06, 4.01)  | 0.49<br>(-0.50, 1.48) | 1.47*<br>(0.09, 2.88)  | 1.73<br>(-0.06, 2.53)  |
| lag02 | 5.83*<br>(0.56, 11.36) | 2.46*<br>(0.25, 4.72)  | 0.65<br>(-0.38, 1.69) | 1.91*<br>(0.40, 3.45)  | 1.86<br>(-0.09, 3.84)  |
| lag03 | 6.76*<br>(1.00, 12.85) | 3.43**<br>(1.04, 5.88) | 0.74<br>(-0.35, 1.83) | 2.44**<br>(0.82, 4.09) | 2.38*<br>(0.28, 4.52)  |
| lag04 | 8.08*<br>(1.85, 14.69) | 4.06**<br>(1.51, 6.67) | 0.83<br>(-0.31, 1.99) | 2.76**<br>(1.04, 4.52) | 2.53*<br>(0.30, 4.81)  |
| lag05 | 7.61*<br>(1.01, 14.63) | 4.06**<br>(1.37, 6.83) | 0.90<br>(-0.30, 2.11) | 2.73**<br>(0.90, 4.59) | 2.20<br>(-0.16, 4.61)  |
| lag06 | 6.84<br>(-0.07, 14.23) | 3.98*<br>(1.15, 6.89)  | 1.02<br>(-0.24, 2.30) | 2.87**<br>(0.94, 4.83) | 2.08<br>(-0.40, 4.62)  |
| lag07 | 6.20<br>(-0.99, 13.92) | 3.71*<br>(0.77, 6.73)  | 1.10<br>(-0.22, 2.44) | 2.88**<br>(0.87, 4.93) | 1.98<br>(-0.60, 4.64)  |

<sup>a</sup> The difference between the 0-5 and 6-14 years old subgroup was statistically significant.

\* Significant difference ( $p < 0.05$ ); \*\*Significant difference ( $p < 0.01$ )

Table S16. For each 10µg/m<sup>3</sup> increase in pollutant concentration in the multiple-pollutant model, ER (and 95% CI) was associated with total respiratory diseases<sup>a</sup>, related to Figure 5.

|                    |                  | Total         | Boy           | Girl                | 0-5<br>years old    | 6-14<br>years old |
|--------------------|------------------|---------------|---------------|---------------------|---------------------|-------------------|
| SO <sub>2</sub>    | +NO <sub>2</sub> | 0.73          | 0.92          | 1.82*               | 2.00*               | 0.96              |
|                    |                  | (-1.02,2.50)  | (-0.82, 2.69) | (0.01, 3.66)        | (0.33, 3.71)        | (-1.23, 3.19)     |
|                    | +O <sub>3</sub>  | 3.30**        | 3.38**        | 4.36**              | 4.63**              | 4.67**            |
|                    |                  | (1.74, 4.88)  | (1.83, 4.96)  | (2.80, 5.93)        | (3.19, 6.10)        | (2.73, 6.64)      |
|                    |                  | -0.16         | -0.005        | 1.11                | 1.44                | -1.06             |
| +PM <sub>10</sub>  | (-1.99, 1.71)    | (-1.83, 1.85) | (-0.80, 3.01) | (-0.33, 3.24)       | (-3.25, 1.18)       |                   |
| +PM <sub>2.5</sub> | 0.92             | 1.02          | 1.96*         | 2.36**              | 1.13                |                   |
|                    | (-0.80,2.66)     | (-0.69, 2.76) | (0.21, 3.74)  | (0.73, 4.02)        | (-0.98, 3.29)       |                   |
| NO <sub>2</sub>    | +SO <sub>2</sub> | 2.67**        | 2.63**        | 2.73**              | 2.65**              | 2.73**            |
|                    |                  | (1.84, 3.52)  | (1.80, 3.47)  | (1.85, 3.62)        | (1.85, 3.46)        | (1.71, 3.76)      |
|                    | +O <sub>3</sub>  | 2.92**        | 2.92**        | 2.92**              | 2.71**              | 3.34**            |
|                    |                  | (2.18, 3.66)  | (2.19, 3.66)  | (2.14, 3.69)        | (2.02, 3.43)        | (2.45, 4.25)      |
|                    |                  | 1.22*         | 1.19*         | 1.25*               | 1.61**              | 0.52              |
| +PM <sub>10</sub>  | (0.24, 2.20)     | (0.22, 2.17)  | (0.23, 2.30)  | (0.66, 2.57)        | (-0.64, 1.70)       |                   |
| +PM <sub>2.5</sub> | 1.74**           | 1.80**        | 1.65**        | 1.79**              | 1.70**              |                   |
|                    | (0.86, 8.62)     | (0.92, 2.69)  | (0.72, 2.58)  | (0.94, 2.65)        | (0.65, 2.77)        |                   |
| O <sub>3</sub>     | +SO <sub>2</sub> | 0.26          | 0.26          | 0.25                | 0.38*               | 0.004             |
|                    |                  | (-0.05, 0.57) | (-0.04, 0.57) | (-0.08, 0.57)       | (0.08, 0.67)        | (-0.38, 0.39)     |
|                    | +NO <sub>2</sub> | 0.18          | 0.20          | 0.16                | 0.28                | -0.03             |
|                    |                  | (-0.12, 0.48) | (-0.10, 0.50) | (-0.16, 0.48)       | (-0.01, 0.57)       | (-0.41, 0.34)     |
|                    |                  | 0.04          | 0.05          | 0.02                | 0.19                | -0.28             |
| +PM <sub>10</sub>  | (-0.27, 0.35)    | (-0.26, 0.36) | (-0.31, 0.35) | (-0.10, 0.50)       | (-0.66, 0.10)       |                   |
| +PM <sub>2.5</sub> | 0.06             | 0.07          | 0.04          | 0.20                | -0.25               |                   |
|                    | (-0.26, 0.37)    | (-0.24, 0.38) | (-0.29, 0.37) | (-0.10, 0.50)       | (-0.63, 0.14)       |                   |
| PM <sub>10</sub>   | +SO <sub>2</sub> | 2.07**        | 2.07**        | 2.09**              | <sup>b</sup> 1.76** | 2.68**            |
|                    |                  | (1.50, 2.65)  | (1.50, 2.64)  | (1.49, 2.69)        | (1.20, 2.32)        | (2.00, 3.37)      |
|                    | +NO <sub>2</sub> | 1.35**        | 1.39**        | 1.31**              | <sup>b</sup> 0.89** | 2.23**            |
|                    |                  | (0.70, 2.01)  | (0.74, 2.04)  | (0.62, 2.00)        | (0.25, 1.53)        | (1.46, 3.00)      |
|                    |                  | 2.07**        | 2.09**        | 2.04**              | <sup>b</sup> 1.73** | 2.72**            |
| +O <sub>3</sub>    | (1.59, 2.55)     | (1.61, 2.57)  | (1.54, 2.55)  | (1.27, 2.20)        | (2.15, 3.29)        |                   |
| +PM <sub>2.5</sub> | 1.79**           | 1.99**        | 1.51**        | <sup>b</sup> 1.21** | 2.91**              |                   |
|                    | (0.87, 2.72)     | (1.07, 2.92)  | (0.55, 2.48)  | (0.31, 2.12)        | (1.84, 4.00)        |                   |
| PM <sub>2.5</sub>  | +SO <sub>2</sub> | 2.09**        | 1.98**        | 2.22**              | 1.95**              | 2.34**            |
|                    |                  | (1.41, 2.78)  | (1.30, 2.66)  | (1.50, 2.95)        | (1.28, 2.62)        | (1.53, 3.17)      |
|                    | +NO <sub>2</sub> | 1.27**        | 1.37**        | 1.38**              | 1.05**              | 1.67**            |
|                    |                  | (0.53, 2.03)  | (0.64, 2.11)  | (0.60, 2.17)        | (0.31, 1.78)        | (0.79, 2.57)      |
|                    |                  | 2.42**        | 2.15**        | 2.49**              | 3.16**              | 2.93**            |
| +O <sub>3</sub>    | (1.80, 3.06)     | (1.54, 2.77)  | (1.84, 3.16)  | (1.55, 2.77)        | (2.18, 3.68)        |                   |
| +PM <sub>10</sub>  | 0.23             | 0.64          | 0.59          | 0.68                | -0.62               |                   |
|                    | (-0.93, 1.40)    | (-0.52, 1.82) | (-0.63, 1.82) | (-0.47, 1.84)       | (-1.95, 0.72)       |                   |

<sup>a</sup> In total population and each subgroup, lag0 was selected for NO<sub>2</sub>, PM<sub>10</sub> and lag1 for O<sub>3</sub>. For SO<sub>2</sub>, lag1 was selected to analyze the impact on the total population and boy, lag6 was selected to girl and 0-5-year-old subgroups, and lag0 for 6-14-year-old subgroups. For PM<sub>2.5</sub>, lag1 was selected for boy and lag0 for other groups.

<sup>b</sup> The difference between the 0-5 and 6-14 years old subgroup was statistically significant.

\* Significant difference ( $p < 0.05$ ); \*\*Significant difference ( $p < 0.01$ )

Table S17. For each 10µg/m<sup>3</sup> increase in pollutant concentration in the multiple-pollutant model, ER (and 95% CI) was associated with acute upper respiratory infection<sup>a</sup>, related to Figure 5.

|                   |                    | Total         | Boy           | Girl                | 0-5<br>years old    | 6-14<br>years old   |
|-------------------|--------------------|---------------|---------------|---------------------|---------------------|---------------------|
| SO <sub>2</sub>   | +NO <sub>2</sub>   | 1.91          | 2.29*         | 1.39                | 1.91                | 1.92                |
|                   |                    | (-0.18, 4.03) | (0.18, 4.44)  | (-0.81, 3.65)       | (-0.11, 3.96)       | (-0.58, 4.48)       |
|                   | +O <sub>3</sub>    | 4.24**        | 4.45**        | 3.97**              | 3.87**              | 4.85**              |
|                   |                    | (2.40, 6.11)  | (2.59, 6.34)  | (2.01, 5.96)        | (2.09, 5.69)        | (2.65, 7.09)        |
|                   |                    | 0.22          | 0.26          | 0.17                | 1.09                | -1.07               |
| +PM <sub>10</sub> | (-1.92, 2.42)      | (-1.90, 4.48) | (-2.12, 2.52) | (-1.03, 3.25)       | (-3.59, 1.52)       |                     |
| NO <sub>2</sub>   | +PM <sub>2.5</sub> | 1.81          | 1.85          | 1.96                | 2.32*               | 1.11                |
|                   |                    | (-0.20, 3.87) | (-0.18, 3.93) | (-0.39, 3.96)       | (0.34, 4.34)        | (-1.27, 3.55)       |
|                   | +SO <sub>2</sub>   | 2.07**        | 1.98**        | 2.19**              | 2.01**              | 2.18**              |
|                   |                    | (1.09, 3.05)  | (0.99, 2.97)  | (1.15, 3.24)        | (1.07, 2.95)        | (0.99, 3.38)        |
|                   |                    | 2.49**        | 2.47**        | 2.53**              | 2.31**              | 2.80**              |
| +O <sub>3</sub>   | (1.66, 3.33)       | (1.63, 3.32)  | (1.64, 3.42)  | (1.51, 3.12)        | (1.79, 3.82)        |                     |
| +PM <sub>10</sub> | 0.63               | 0.38          | 0.94          | 1.13*               | -0.13               |                     |
| (-0.49, 7.75)     | (-0.73, 1.52)      | (-0.25, 2.14) | (0.05, 2.23)  | (-1.45, 1.20)       |                     |                     |
| O <sub>3</sub>    | +PM <sub>2.5</sub> | 1.42**        | 1.23*         | 1.67**              | 1.70**              | 1.06                |
|                   |                    | (0.41, 1.75)  | (0.21, 2.25)  | (0.60, 2.76)        | (0.71, 2.70)        | (-0.14, 2.27)       |
|                   | +SO <sub>2</sub>   | 0.17          | 0.21          | 0.11                | 0.35                | -0.16               |
|                   |                    | (-0.20, 0.54) | (-0.16, 0.58) | (-0.28, 0.51)       | (-0.00, 0.70)       | (-0.61, 0.30)       |
|                   |                    | 0.15          | 0.21          | 0.07                | 0.33                | -0.17               |
| +NO <sub>2</sub>  | (-0.21, 0.51)      | (-0.16, 0.58) | (-0.32, 0.46) | (-0.02, 0.67)       | (-0.62, 0.28)       |                     |
| +PM <sub>10</sub> | -0.07              | -0.04         | -0.11         | 0.19                | 0.19                |                     |
| (-0.44, 0.30)     | (-0.41, 0.34)      | (-0.35, 0.40) | (-0.17, 0.54) | (-0.17, 0.54)       |                     |                     |
| PM <sub>10</sub>  | +PM <sub>2.5</sub> | -0.01         | 0.02          | -0.04               | <sup>b</sup> 0.25   | <sup>b</sup> -0.43  |
|                   |                    | (-0.38, 0.37) | (-0.35, 0.40) | (-0.44, 0.36)       | (-0.11, 0.60)       | (-0.89, 0.03)       |
|                   | +SO <sub>2</sub>   | 2.06**        | 2.18**        | 1.91**              | <sup>b</sup> 1.61** | <sup>b</sup> 2.77** |
|                   |                    | (1.39, 2.74)  | (1.50, 2.87)  | (1.19, 2.64)        | (0.95, 2.27)        | (1.97, 3.59)        |
|                   |                    | 1.81**        | 2.05**        | 1.50**              | <sup>b</sup> 1.28** | <sup>b</sup> 2.62** |
| +NO <sub>2</sub>  | (1.07, 2.56)       | (1.30, 2.80)  | (0.71, 2.30)  | (0.55, 2.01)        | (1.74, 3.51)        |                     |
| +O <sub>3</sub>   | 2.14**             | 2.25**        | 2.00**        | 1.72**              | 1.72**              |                     |
| (1.58, 2.71)      | (1.68, 2.82)       | (1.41, 2.60)  | (1.17, 2.27)  | (1.17, 2.27)        |                     |                     |
| PM <sub>2.5</sub> | +PM <sub>2.5</sub> | 2.16**        | 2.18**        | 2.14**              | 1.91**              | 2.59**              |
|                   |                    | (1.11, 3.22)  | (1.11, 3.25)  | (1.02, 3.27)        | (0.86, 2.97)        | (1.37, 3.82)        |
|                   | +SO <sub>2</sub>   | 1.95**        | 2.12**        | 1.72**              | 1.53**              | 2.57**              |
|                   |                    | (1.14, 2.76)  | (1.31, 2.94)  | (0.87, 2.59)        | (0.74, 2.32)        | (1.62, 3.53)        |
|                   |                    | 1.58**        | 1.86**        | 1.22**              | 1.10*               | 2.27**              |
| +NO <sub>2</sub>  | (0.72, 2.45)       | (0.99, 2.74)  | (0.30, 2.14)  | (0.25, 1.96)        | (1.26, 3.29)        |                     |
| +O <sub>3</sub>   | 2.34**             | 2.51**        | 2.13**        | <sup>b</sup> 1.85** | <sup>b</sup> 3.09** |                     |
| (1.61, 3.08)      | (1.77, 3.25)       | (1.35, 2.91)  | (1.13, 2.57)  | (2.23, 3.95)        |                     |                     |
| +PM <sub>10</sub> | -0.08              | 0.08          | -0.28         | -0.12               | -0.04               |                     |
|                   | (-1.40, 1.27)      | (-1.26, 1.44) | (-1.69, 1.14) | (-1.45, 1.22)       | (-1.56, 1.50)       |                     |

<sup>a</sup> In total population and each subgroup, lag1 was selected for SO<sub>2</sub>, NO<sub>2</sub>, PM<sub>10</sub>, PM<sub>2.5</sub>, and O<sub>3</sub>.

<sup>b</sup> The difference between the 0-5 and 6-14 years old subgroup was statistically significant.

\* Significant difference ( $p < 0.05$ ); \*\*Significant difference ( $p < 0.01$ )

Table S18. For each 10µg/m<sup>3</sup> increase in pollutant concentration in the multiple-pollutant model, ER (and 95% CI) was associated with bronchitis<sup>a</sup>, related to Figure 5.

|                    |                    | Total         | Boy           | Girl          | 0-5<br>years old | 6-14<br>years old |
|--------------------|--------------------|---------------|---------------|---------------|------------------|-------------------|
| SO <sub>2</sub>    | +NO <sub>2</sub>   | -1.21         | -0.79         | -1.87         | -1.68            | 0.32              |
|                    |                    | (-3.39, 1.03) | (-3.03, 1.50) | (-4.38, 0.72) | (-3.88, 0.58)    | (-2.56, 3.29)     |
|                    | +O <sub>3</sub>    | 1.90          | 2.24*         | 1.35          | 1.48             | 3.20*             |
|                    |                    | (-0.08, 3.91) | (0.23, 4.30)  | (-0.92, 3.68) | (-0.52, 3.52)    | (0.63, 5.83)      |
|                    | +PM <sub>10</sub>  | -1.59         | -1.13         | -2.31         | -1.79            | -0.88             |
|                    | (-3.93, 0.80)      | (-3.52, 1.32) | (-5.00, 0.45) | (-4.16, 0.64) | (-3.91, 2.25)    |                   |
|                    | +PM <sub>2.5</sub> | -0.48         | -0.02         | -1.21         | -0.83            | 0.70              |
|                    |                    | (-2.66, 1.75) | (-2.25, 2.26) | (-3.72, 1.36) | (-3.04, 1.43)    | (-2.14, 3.62)     |
| NO <sub>2</sub>    | +SO <sub>2</sub>   | 2.98**        | 2.94**        | 3.04**        | 3.08**           | 2.66**            |
|                    |                    | (1.97, 4.00)  | (1.92, 3.98)  | (1.88, 4.23)  | (2.07, 4.10)     | (1.31, 4.03)      |
|                    | +O <sub>3</sub>    | 2.51**        | 2.55**        | 2.43**        | 2.47**           | 2.62**            |
|                    |                    | (1.65, 3.37)  | (1.68, 3.43)  | (1.44, 3.43)  | (1.61, 3.34)     | (1.47, 3.78)      |
|                    | +PM <sub>10</sub>  | 1.85**        | 1.89**        | 1.79*         | 2.06**           | 1.22              |
|                    | (0.66, 3.06)       | (0.67, 3.12)  | (0.41, 3.19)  | (0.86, 3.28)  | (-0.34, 2.82)    |                   |
|                    | +PM <sub>2.5</sub> | 1.95**        | 2.02**        | 1.83**        | 2.02**           | 1.78*             |
|                    |                    | (0.87, 3.03)  | (0.93, 3.13)  | (0.59, 3.09)  | (0.93, 3.12)     | (0.36, 3.21)      |
| O <sub>3</sub>     | +SO <sub>2</sub>   | 0.45*         | 0.47*         | 0.41          | 0.49*            | 0.32              |
|                    |                    | (0.05, 0.84)  | (0.07, 0.87)  | (-0.04, 0.87) | (0.09, 0.88)     | (-0.20, 0.85)     |
|                    | +NO <sub>2</sub>   | 0.27          | 0.30          | 0.21          | 0.28             | 0.22              |
|                    |                    | (-0.12, 0.65) | (-0.09, 0.69) | (-0.24, 0.65) | (-0.10, 0.67)    | (-0.30, 0.73)     |
|                    | +PM <sub>10</sub>  | 0.20          | 0.23          | 0.14          | 0.25             | 0.06              |
|                    | (-0.20, 0.59)      | (-0.17, 0.64) | (-0.32, 0.60) | (-0.15, 0.64) | (-0.47, 0.29)    |                   |
|                    | +PM <sub>2.5</sub> | 0.21          | 0.25          | 0.14          | 0.25             | 0.11              |
|                    |                    | (-0.19, 0.61) | (-0.15, 0.65) | (-0.32, 0.60) | (-0.15, 0.64)    | (-0.43, 0.64)     |
| PM <sub>10</sub>   | +SO <sub>2</sub>   | 1.95**        | 1.91**        | 2.02**        | 1.88**           | 2.14**            |
|                    |                    | (1.23, 2.67)  | (1.18, 2.64)  | (1.21, 2.98)  | (1.15, 2.61)     | (1.19, 3.10)      |
|                    | +NO <sub>2</sub>   | 0.74          | 0.77          | 0.69          | 0.53             | 1.38**            |
|                    |                    | (-0.05, 1.54) | (-0.04, 1.58) | (-0.23, 1.62) | (-0.28, 1.33)    | (0.34, 2.44)      |
|                    | +O <sub>3</sub>    | 1.53**        | 1.56**        | 1.49**        | 1.40**           | 1.94**            |
| (0.95, 2.13)       |                    | (0.96, 2.16)  | (0.81, 2.18)  | (0.81, 2.00)  | (1.16, 2.72)     |                   |
| +PM <sub>2.5</sub> | 1.13               | 1.23*         | 0.97          | 0.89          | 1.85*            |                   |
|                    | (-0.02, 2.30)      | (0.05, 2.42)  | (-0.37, 2.32) | (-0.29, 2.09) | (0.38, 3.34)     |                   |
| PM <sub>2.5</sub>  | +SO <sub>2</sub>   | 2.16**        | 2.09**        | 2.26**        | 2.16**           | 2.10**            |
|                    |                    | (1.29, 3.03)  | (1.21, 2.98)  | (1.26, 3.27)  | (1.29, 3.04)     | (0.98, 3.24)      |
|                    | +NO <sub>2</sub>   | 0.95*         | 0.95          | 0.96          | 0.82             | 1.29*             |
|                    |                    | (0.02, 1.89)  | (-0.00, 1.90) | (-0.12, 2.05) | (-0.12, 1.78)    | (0.09, 2.51)      |
|                    | +O <sub>3</sub>    | 1.90**        | 1.91**        | 1.89**        | 1.80**           | 2.18**            |
| (1.13, 2.68)       |                    | (1.13, 2.70)  | (1.00, 2.79)  | (1.02, 2.58)  | (1.17, 3.20)     |                   |
| +PM <sub>10</sub>  | 0.75               | 0.67          | 0.88          | 0.94          | 0.17             |                   |
|                    | (-0.75, 2.26)      | (-0.86, 2.21) | (-0.85, 2.64) | (-0.59, 2.50) | (-1.68, 2.07)    |                   |

<sup>a</sup> In total population and each subgroup, lag1 was selected for SO<sub>2</sub>, NO<sub>2</sub>, PM<sub>10</sub>, PM<sub>2.5</sub>, and O<sub>3</sub>.

\* Significant difference ( $p < 0.05$ ); \*\*Significant difference ( $p < 0.01$ )



Table S19. For each 10µg/m<sup>3</sup> increase in pollutant concentration in the multiple-pollutant model, ER (and 95% CI) was associated with pneumonia<sup>a</sup>, related to Figure 5.

|                   |                    | Total         | Boy                 | Girl                | 0-5<br>years old | 6-14<br>years old |
|-------------------|--------------------|---------------|---------------------|---------------------|------------------|-------------------|
| SO <sub>2</sub>   | +NO <sub>2</sub>   | 0.14          | -0.03               | 0.34                | 1.82             | -3.72             |
|                   |                    | (-3.01, 3.40) | (-3.72, 3.81)       | (-3.98, 4.84)       | (-1.63, 5.39)    | (-8.84, 1.68)     |
|                   | +O <sub>3</sub>    | 4.13**        | 4.02*               | 4.24*               | 5.87**           | 1.31              |
|                   |                    | (1.26, 7.08)  | (0.66, 7.49)        | (0.32, 8.30)        | (2.74, 9.10)     | (-3.44, 6.29)     |
|                   | +PM <sub>10</sub>  | 0.85          | 2.21                | -1.08               | 2.56             | -3.08             |
|                   | (-2.56, 4.37)      | (-1.83, 6.42) | (-5.64, 3.70)       | (-1.16, 6.42)       | (-8.60, 2.77)    |                   |
| NO <sub>2</sub>   | +PM <sub>2.5</sub> | 1.25          | 2.36                | -0.33               | 3.23             | -3.10             |
|                   |                    | (-1.90, 4.50) | (-1.38, 6.23)       | (-4.57, 4.09)       | (-0.23, 6.81)    | (-8.18, 2.25)     |
|                   | +SO <sub>2</sub>   | 4.09**        | 4.01**              | 4.21**              | 3.81**           | 5.22**            |
|                   |                    | (2.64, 5.57)  | (2.30, 5.76)        | (2.21, 6.24)        | (2.25, 5.39)     | (2.69, 7.82)      |
|                   | +O <sub>3</sub>    | 3.76**        | 3.69**              | 3.85**              | 3.97**           | 3.97**            |
| (2.53, 5.01)      |                    | (2.24, 5.17)  | (2.15, 5.57)        | (2.65, 5.31)        | (1.80, 6.18)     |                   |
| +PM <sub>10</sub> | 3.48**             | 4.36**        | 2.27                | 3.44**              | 3.93*            |                   |
|                   | (1.75, 5.24)       | (2.31, 6.46)  | (-0.07, 4.66)       | (1.59, 5.32)        | (0.92, 7.03)     |                   |
| O <sub>3</sub>    | +PM <sub>2.5</sub> | 3.01**        | 3.76**              | 1.99                | 3.31**           | 2.70*             |
|                   |                    | (1.45, 4.60)  | (1.90, 5.65)        | (-0.12, 4.15)       | (1.62, 5.03)     | (0.06, 5.41)      |
|                   | +SO <sub>2</sub>   | 0.79**        | 0.69*               | 0.93*               | 0.60*            | 0.83              |
|                   |                    | (0.23, 1.35)  | (0.04, 1.35)        | (0.16, 1.70)        | (0.01, 1.19)     | (-0.18, 1.85)     |
|                   | +NO <sub>2</sub>   | 0.61*         | 0.52                | 0.75                | 0.50             | 0.46              |
| (0.07, 1.15)      |                    | (-0.11, 1.15) | (0.00, 1.50)        | (-0.07, 1.08)       | (-0.52, 1.44)    |                   |
| +PM <sub>10</sub> | 0.60*              | 0.61          | 0.58                | 0.47                | 0.47             |                   |
|                   | (0.04, 1.16)       | (-0.04, 1.27) | (-0.19, 1.35)       | (-0.13, 1.06)       | (-0.55, 1.49)    |                   |
| PM <sub>10</sub>  | +PM <sub>2.5</sub> | 0.56*         | 0.59                | 0.52                | 0.47             | 0.30              |
|                   |                    | (0.01, 1.12)  | (-0.07, 1.25)       | (-0.25, 1.29)       | (-0.12, 1.07)    | (-0.71, 1.32)     |
|                   | +SO <sub>2</sub>   | 2.11**        | 1.35*               | 3.17**              | 1.94**           | 2.77**            |
|                   |                    | (1.07, 3.15)  | (0.14, 2.57)        | (1.74, 4.62)        | (0.83, 3.05)     | (0.96, 4.62)      |
|                   | +NO <sub>2</sub>   | 0.59          | <sup>b</sup> -0.32  | <sup>b</sup> 1.84*  | 0.75             | 0.27              |
| (-0.55, 1.74)     |                    | (-1.65, 1.03) | (0.26, 3.45)        | (-0.47, 1.99)       | (-1.72, 2.30)    |                   |
| +O <sub>3</sub>   | 1.96**             | 1.45**        | 2.65**              | 2.18**              | 1.92*            |                   |
|                   | (1.11, 2.81)       | (0.46, 2.45)  | (1.48, 3.83)        | (1.27, 3.09)        | (0.43, 3.44)     |                   |
| PM <sub>2.5</sub> | +PM <sub>2.5</sub> | 0.56          | 0.53                | 0.56                | 1.30             | -0.90             |
|                   |                    | (-1.10, 2.24) | (-1.42, 2.52)       | (-1.72, 2.88)       | (-0.51, 3.14)    | (-3.64, 1.92)     |
|                   | +SO <sub>2</sub>   | 2.90**        | <sup>b</sup> 1.94** | <sup>b</sup> 4.25** | 2.47**           | 4.24**            |
|                   |                    | (1.66, 4.16)  | (0.49, 3.42)        | (2.54, 5.99)        | (1.14, 3.81)     | (2.09, 6.44)      |
|                   | +NO <sub>2</sub>   | 1.45*         | <sup>b</sup> 0.32   | <sup>b</sup> 3.03** | 1.24             | 2.08              |
| (0.10, 2.82)      |                    | (-1.27, 1.93) | (1.17, 4.92)        | (-0.22, 2.72)       | (-0.21, 4.43)    |                   |
| +O <sub>3</sub>   | 2.79**             | 2.05**        | 3.83**              | 2.84**              | 3.36**           |                   |
|                   | (1.69, 3.91)       | (0.76, 3.36)  | (2.31, 5.36)        | (1.66, 4.03)        | (1.43, 5.33)     |                   |
| +PM <sub>10</sub> | 2.52*              | 1.83          | 3.52*               | 1.63                | 4.61*            |                   |
|                   | (0.34, 4.76)       | (-0.73, 4.46) | (0.51, 6.62)        | (-0.72, 4.04)       | (0.91, 8.44)     |                   |

<sup>a</sup> In total population and each subgroup, lag1 was selected for SO<sub>2</sub>, NO<sub>2</sub>, PM<sub>10</sub>, PM<sub>2.5</sub>, and O<sub>3</sub>.

<sup>b</sup> The difference between the boy and girl subgroup was statistically significant.

\* Significant difference ( $p < 0.05$ ); \*\*Significant difference ( $p < 0.01$ )

Table S20. For each 10µg/m<sup>3</sup> increase in pollutant concentration in the multiple-pollutant model, ER (and 95% CI) was associated with asthma<sup>a</sup>, related to Figure 5.

|                    |                  | Total         | Boy             | Girl                | 0-5<br>years old     | 6-14<br>years old |
|--------------------|------------------|---------------|-----------------|---------------------|----------------------|-------------------|
| SO <sub>2</sub>    | +NO <sub>2</sub> | -1.05         | -1.96           | -1.31               | <sup>b</sup> -9.50*  | <sup>b</sup> 1.99 |
|                    |                  | (-5.31, 3.41) | (-6.81, 3.14)   | (-8.00, 5.86)       | (-16.41, -2.03)      | (-2.69, 6.90)     |
|                    | +O <sub>3</sub>  | 0.66          | 2.12            | -1.36               | -3.57                | 2.08              |
|                    |                  | (-3.13, 4.60) | (-2.29, 6.74)   | (-7.19, 4.84)       | (-10.05, 3.38)       | (-2.00, 6.34)     |
|                    |                  | -1.86         | 0.42            | -1.00               | <sup>b</sup> -10.08* | <sup>b</sup> 1.13 |
| +PM <sub>10</sub>  | (-6.41, 2.92)    | (-4.94, 6.07) | (-8.20, 6.77)   | (-17.43, -2.07)     | (-3.88, 6.40)        |                   |
| +PM <sub>2.5</sub> | -0.50            | 2.22          | 0.08            | <sup>b</sup> -8.25* | <sup>b</sup> 2.26    |                   |
| (-4.78, 3.96)      | (-2.82, 7.53)    | (-6.66, 7.30) | (-15.24, -0.68) | (-2.42, 7.16)       |                      |                   |
| NO <sub>2</sub>    | +SO <sub>2</sub> | 1.66          | 3.20**          | 0.97                | <sup>b</sup> 5.49**  | <sup>b</sup> 0.27 |
|                    |                  | (-0.30, 3.65) | (0.93, 5.53)    | (-2.08, 4.11)       | (2.07, 9.02)         | (-1.83, 2.41)     |
|                    | +O <sub>3</sub>  | 1.30          | 2.80**          | 0.25                | 3.05*                | 0.65              |
|                    |                  | (-0.36, 2.99) | (0.87, 4.77)    | (-2.32, 2.88)       | (0.17, 6.02)         | (-1.14, 2.48)     |
|                    |                  | 0.64          | 3.87**          | 0.81                | 2.83                 | -0.16             |
| +PM <sub>10</sub>  | (-1.71, 3.05)    | (1.06, 6.75)  | (-2.88, 4.65)   | (-1.27, 7.11)       | (-2.68, 2.43)        |                   |
| +PM <sub>2.5</sub> | 1.16             | 4.35**        | 1.24            | 2.57                | 0.64                 |                   |
| (-0.98, 3.35)      | (1.78, 6.98)     | (-2.12, 4.71) | (-1.18, 6.45)   | (-1.66, 3.00)       |                      |                   |
| O <sub>3</sub>     | +SO <sub>2</sub> | 0.25          | 0.00            | 0.75                | 0.49                 | 0.15              |
|                    |                  | (-0.51, 1.01) | (-0.87, 0.88)   | (-0.44, 1.96)       | (-0.81, 1.81)        | (-0.66, 0.97)     |
|                    | +NO <sub>2</sub> | 0.13          | -0.18           | 0.63                | -0.10                | 0.21              |
|                    |                  | (-0.60, 0.87) | (-1.03, 0.67)   | (-0.53, 1.80)       | (-1.36, 1.17)        | (-0.58, 1.02)     |
|                    |                  | 0.04          | -0.09           | 0.70                | -0.14                | 0.11              |
| +PM <sub>10</sub>  | (-0.72, 0.81)    | (-0.98, 0.81) | (-0.51, 1.93)   | (-1.45, 1.19)       | (-0.73, 0.95)        |                   |
| +PM <sub>2.5</sub> | 0.11             | 0.07          | 0.79            | -0.15               | 0.21                 |                   |
| (-0.65, 0.89)      | (-0.82, 0.97)    | (-0.42, 2.02) | (-1.45, 1.18)   | (-0.62, 1.06)       |                      |                   |
| PM <sub>10</sub>   | +SO <sub>2</sub> | 1.38          | 0.79            | 0.44                | <sup>b</sup> 3.54**  | <sup>b</sup> 0.56 |
|                    |                  | (-0.06, 2.83) | (-0.86, 2.47)   | (-1.80, 2.73)       | (1.09, 6.06)         | (-0.99, 2.14)     |
|                    | +NO <sub>2</sub> | 0.68          | -1.05           | -0.17               | 0.14                 | 0.87              |
|                    |                  | (-0.93, 2.31) | (-2.90, 0.84)   | (-2.68, 2.42)       | (-2.60, 2.95)        | (-0.88, 2.64)     |
|                    |                  | 0.98          | 0.93            | -0.17               | 1.62                 | 0.73              |
| +O <sub>3</sub>    | (-0.20, 2.17)    | (-0.44, 2.31) | (-2.01, 1.70)   | (-0.39, 3.67)       | (-0.56, 2.02)        |                   |
| +PM <sub>2.5</sub> | 1.71             | 3.04*         | 1.51            | 0.64                | 2.04                 |                   |
| (-0.78, 4.27)      | (0.14, 6.04)     | (-2.37, 5.55) | (-3.72, 5.19)   | (-0.64, 4.79)       |                      |                   |
| PM <sub>2.5</sub>  | +SO <sub>2</sub> | 1.10          | -0.06           | -0.08               | <sup>b</sup> 3.95**  | <sup>b</sup> 0.06 |
|                    |                  | (-0.63, 2.86) | (-2.05, 1.96)   | (-2.76, 2.68)       | (0.95, 7.03)         | (-1.80, 1.95)     |
|                    | +NO <sub>2</sub> | 0.30          | -2.11           | -0.79               | 0.54                 | 0.19              |
|                    |                  | (-1.60, 2.23) | (-4.30, 0.12)   | (-3.74, 2.25)       | (-2.73, 3.92)        | (-1.85, 2.28)     |
|                    |                  | 0.90          | 0.38            | -0.67               | 2.18                 | 0.40              |
| +O <sub>3</sub>    | (-0.64, 2.46)    | (-1.41, 2.19) | (-3.05, 1.77)   | (-0.45, 4.88)       | (-1.26, 2.10)        |                   |
| +PM <sub>10</sub>  | -1.01            | -3.05         | -1.80           | 1.30                | -1.78                |                   |
| (-4.16, 2.25)      | (-6.63, 0.66)    | (-6.68, 3.33) | (-4.39, 7.34)   | (-5.13, 1.69)       |                      |                   |

<sup>a</sup> In total population and each subgroup, lag1 was selected for SO<sub>2</sub>, NO<sub>2</sub>, PM<sub>10</sub>, PM<sub>2.5</sub>, and O<sub>3</sub>.

<sup>b</sup> The difference between the 0-5 and 6-14 years old subgroup was statistically significant.

\* Significant difference ( $p < 0.05$ ); \*\*Significant difference ( $p < 0.01$ )

Table S21. The ER (and 95% CI) of the number of emergency department visits for respiratory diseases caused by the increase of 10 µg/m<sup>3</sup> of pollutants in different time smoothing trends <sup>a,b</sup>, related to STAR Methods.

|                  |                   | ER% (95%CI)            |                        |                        |                        |                        |
|------------------|-------------------|------------------------|------------------------|------------------------|------------------------|------------------------|
|                  | df                | 5                      | 6                      | 7                      | 8                      | 9                      |
| Total            | SO <sub>2</sub>   | 5.06**<br>(3.49, 6.66) | 4.61**<br>(2.94, 6.31) | 3.61**<br>(2.07, 5.17) | 3.69**<br>(2.18, 5.22) | 2.57**<br>(1.23, 3.92) |
|                  | NO <sub>2</sub>   | 3.11**<br>(2.41, 3.81) | 3.22**<br>(2.48, 3.96) | 2.71**<br>(2.03, 3.40) | 2.42**<br>(1.74, 3.10) | 2.08**<br>(1.47, 2.69) |
|                  | O <sub>3</sub>    | 0.41**<br>(0.10, 0.72) | 0.48**<br>(0.16, 0.80) | 0.46**<br>(0.17, 0.76) | 0.36**<br>(0.07, 0.65) | 0.40**<br>(0.14, 0.66) |
|                  | PM <sub>10</sub>  | 2.20**<br>(1.74, 2.66) | 2.20**<br>(1.71, 2.69) | 1.95**<br>(1.50, 2.40) | 1.55**<br>(1.10, 2.00) | 1.24**<br>(0.83, 1.64) |
|                  | PM <sub>2.5</sub> | 2.56**<br>(1.97, 3.16) | 2.63**<br>(2.01, 3.26) | 2.23**<br>(1.65, 2.81) | 1.84**<br>(1.27, 2.42) | 1.62**<br>(1.10, 2.14) |
| Boy              | SO <sub>2</sub>   | 5.22**<br>(3.65, 6.82) | 4.79**<br>(3.12, 6.49) | 3.75**<br>(2.21, 5.30) | 3.83**<br>(2.33, 5.36) | 2.71**<br>(1.36, 4.07) |
|                  | NO <sub>2</sub>   | 3.11**<br>(2.41, 3.82) | 3.23**<br>(2.49, 3.97) | 2.72**<br>(2.04, 3.40) | 2.44**<br>(1.77, 3.12) | 2.13**<br>(1.52, 2.75) |
|                  | O <sub>3</sub>    | 0.42**<br>(0.11, 0.73) | 0.49**<br>(0.17, 0.81) | 0.48**<br>(0.18, 0.77) | 0.38*<br>(0.09, 0.67)  | 0.42**<br>(0.16, 0.68) |
|                  | PM <sub>10</sub>  | 2.22**<br>(1.76, 2.68) | 2.22**<br>(1.73, 2.71) | 1.97**<br>(1.52, 2.42) | 1.58**<br>(1.13, 2.02) | 1.28**<br>(0.88, 1.69) |
|                  | PM <sub>2.5</sub> | 2.53**<br>(1.94, 3.12) | 2.60**<br>(1.98, 3.22) | 2.19**<br>(1.62, 2.77) | 1.80**<br>(1.23, 2.38) | 1.61**<br>(1.09, 2.13) |
| Girl             | SO <sub>2</sub>   | 4.84**<br>(3.19, 6.51) | 4.37**<br>(2.63, 6.14) | 3.41**<br>(1.79, 5.05) | 3.49**<br>(1.90, 5.11) | 2.38**<br>(0.96, 3.81) |
|                  | NO <sub>2</sub>   | 3.10**<br>(2.36, 3.84) | 3.20**<br>(2.43, 3.98) | 2.70**<br>(1.98, 3.42) | 2.38**<br>(1.67, 3.10) | 2.01**<br>(1.36, 2.66) |
|                  | O <sub>3</sub>    | 0.40**<br>(0.08, 0.73) | 0.47**<br>(0.14, 0.81) | 0.45**<br>(0.13, 0.76) | 0.34*<br>(0.03, 0.64)  | 0.37**<br>(0.09, 0.64) |
|                  | PM <sub>10</sub>  | 2.17**<br>(1.68, 2.65) | 2.17**<br>(1.66, 2.68) | 1.92**<br>(1.45, 2.39) | 2.17**<br>(1.66, 2.68) | 1.17**<br>(0.74, 1.60) |
|                  | PM <sub>2.5</sub> | 2.61**<br>(1.99, 3.23) | 2.68**<br>(2.03, 3.33) | 2.28**<br>(1.68, 2.89) | 1.89**<br>(1.28, 2.50) | 1.63**<br>(1.08, 2.18) |
| 0-5<br>years old | SO <sub>2</sub>   | 4.49**<br>(2.97, 6.03) | 4.10**<br>(2.49, 5.74) | 3.21**<br>(1.73, 4.71) | 3.20**<br>(1.74, 4.67) | 2.27**<br>(0.92, 3.64) |
|                  | NO <sub>2</sub>   | 2.92**<br>(2.25, 3.60) | 3.06**<br>(2.35, 3.77) | 2.59**<br>(1.94, 3.25) | 2.22**<br>(1.57, 2.87) | 1.92**<br>(1.31, 2.53) |
|                  | O <sub>3</sub>    | 0.52**<br>(0.22, 0.81) | 0.58**<br>(0.27, 0.89) | 0.56**<br>(0.27, 0.84) | 0.43**<br>(0.15, 0.71) | 0.46**<br>(0.20, 0.72) |
|                  | PM <sub>10</sub>  | 1.91**<br>(1.46, 2.36) | 1.93**<br>(1.45, 2.40) | 1.68**<br>(1.24, 2.12) | 1.29**<br>(0.86, 1.73) | 1.03**<br>(0.63, 1.44) |

---

|                   |                   |                        |                        |                        |                        |                        |
|-------------------|-------------------|------------------------|------------------------|------------------------|------------------------|------------------------|
| 6-14<br>years old | PM <sub>2.5</sub> | 2.36**<br>(1.79, 2.94) | 2.45**<br>(1.85, 3.06) | 2.04**<br>(1.49, 2.61) | 1.63**<br>(1.08, 2.19) | 1.44**<br>(0.92, 1.97) |
|                   | SO <sub>2</sub>   | 6.23**<br>(4.32, 8.18) | 5.68**<br>(3.69, 7.72) | 4.45**<br>(2.59, 6.34) | 4.75**<br>(2.91, 6.61) | 3.20**<br>(1.68, 4.75) |
|                   | NO <sub>2</sub>   | 3.49**<br>(2.63, 4.36) | 3.55**<br>(2.65, 4.45) | 2.99**<br>(2.15, 3.83) | 3.49**<br>(2.63, 4.36) | 2.46**<br>(1.75, 3.16) |
|                   | O <sub>3</sub>    | 0.18<br>(-0.20, 0.57)  | 0.27<br>(-0.12, 0.66)  | 0.26<br>(-0.11, 0.63)  | 0.21<br>(-0.15, 0.57)  | 0.27<br>(-0.03, 0.58)  |
|                   | PM <sub>10</sub>  | 2.77**<br>(2.22, 3.33) | 2.74**<br>(2.16, 3.32) | 2.48**<br>(1.94, 3.02) | 2.07**<br>(1.54, 2.61) | 1.64**<br>(1.18, 2.09) |
|                   | PM <sub>2.5</sub> | 2.96**<br>(2.25, 3.67) | 2.98**<br>(2.24, 3.72) | 2.58**<br>(1.88, 3.27) | 2.24**<br>(1.55, 2.93) | 1.95**<br>(1.36, 2.53) |

---

<sup>a</sup> The concentrations of pollutants on the day of exposure were selected for analysis. However, there was no statistical significance in the effect of O<sub>3</sub> on the day of exposure, so the concentration of lag1 was selected for sensitivity analysis.

<sup>b</sup> Except for the O<sub>3</sub> effect of the 6-14-year-old subgroup, the pollutant effect of the other groups was statistically significant.

\* Significant difference ( $p < 0.05$ ); \*\*Significant difference

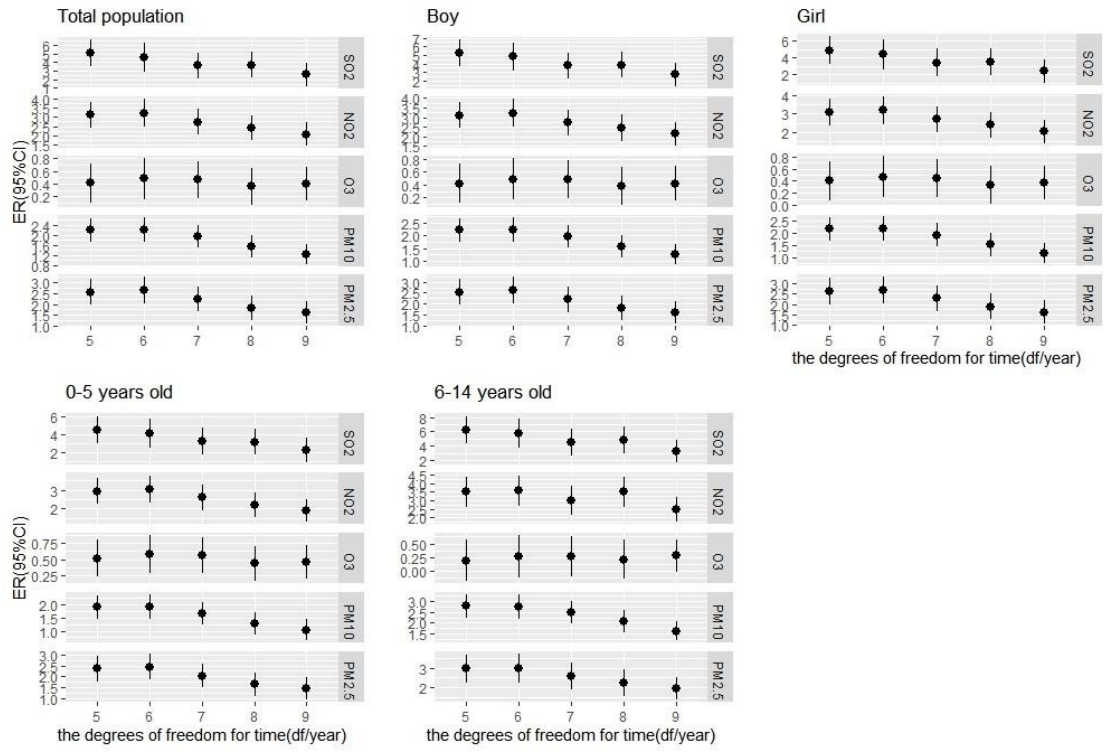

Figure. S1. The percentage and 95% CI of the number of emergency department visits for respiratory diseases in the population aged 0-14, boy, girl, 0-5-year-old and 6-14-year-old subgroups caused by the increase of  $10 \mu\text{g}/\text{m}^3$  of pollutants in different time smoothing trends. The concentrations of pollutants on the day of exposure were selected for analysis. However, there was no statistical significance in the effect of  $\text{O}_3$  on the day of exposure, so the concentration of lag1 was selected for sensitivity analysis. Related to STAR Methods.
